# Supplementary material for: Synthesis and luminescent properties of hetero-bimetallic and hetero-trimetallic Ru(ii)/Au(i) or Ir(iii)/Au(i) complexes
Source: Royal Society of Chemistry journal article supplement (doi:10.1039/d3dt03690a), 2024-01-01
Supplement: d3dt03690a1.pdf [file d3dt03690a1.pdf]

## Electronic Supplementary Information

### Synthesis and luminescent properties of Ru(II)/Au(I) or Ir(III)/Au(I) hetero-bimetallic and hetero-trimetallic complexes

Richard C. Knighton<sup>a</sup> and Simon J. A. Pope<sup>a\*</sup>

<sup>a</sup> School of Chemistry, Main Building, Cardiff University, Cardiff CF10 3AT, Cymru/ Wales, UK. E-mail: popesj@cardiff.ac.uk

|                                                                                                                                                                                                                                  |    |
|----------------------------------------------------------------------------------------------------------------------------------------------------------------------------------------------------------------------------------|----|
| Figure S1. <sup>1</sup> H NMR spectrum (300 MHz, 293 K, CDCl <sub>3</sub> ) of dimeric [Ir(Me <sub>3</sub> quinox) <sub>2</sub> (μ <sub>2</sub> -Cl)] <sub>2</sub> .                                                             | 3  |
| Figure S2. <sup>1</sup> H NMR spectrum of [Ir(Me <sub>3</sub> quinox) <sub>2</sub> (MeCN) <sub>2</sub> ][PF <sub>6</sub> ] (500 MHz, 293 K, CD <sub>3</sub> CN)                                                                  | 3  |
| Figure S3. <sup>13</sup> C{ <sup>1</sup> H} NMR spectrum of [Ir(Me <sub>3</sub> quinox) <sub>2</sub> (MeCN) <sub>2</sub> ][PF <sub>6</sub> ] (500 MHz, 293 K, CD <sub>3</sub> CN).                                               | 4  |
| Figure S4. HRMS of [Ir(Me <sub>3</sub> quinox) <sub>2</sub> (MeCN) <sub>2</sub> ][PF <sub>6</sub> ] (ES+). (Top - theoretical; bottom - experimental).                                                                           | 4  |
| Figure S5. <sup>1</sup> H NMR spectrum of [Ir(Me <sub>3</sub> quinox) <sub>2</sub> (bipy-Im1)][PF <sub>6</sub> ] <sub>2</sub> (500 MHz, 293 K, CD <sub>3</sub> CN).                                                              | 5  |
| Figure S6. <sup>13</sup> C{ <sup>1</sup> H} NMR spectrum of [Ir(Me <sub>3</sub> quinox) <sub>2</sub> (bipy-Im1)][PF <sub>6</sub> ] <sub>2</sub> (126 MHz, 293 K, CD <sub>3</sub> CN).                                            | 5  |
| Figure S7. HRMS of [Ir(Me <sub>3</sub> quinox) <sub>2</sub> (bipy-Im1)][PF <sub>6</sub> ] <sub>2</sub> (ES+). (Top - theoretical; bottom – experimental)                                                                         | 6  |
| Figure S8. <sup>1</sup> H NMR spectrum of [Ir(Me <sub>3</sub> quinox) <sub>2</sub> (bipy-Im2)][PF <sub>6</sub> ] <sub>3</sub> (500 MHz, 293 K, CD <sub>3</sub> CN).                                                              | 6  |
| Figure S9. <sup>13</sup> C{ <sup>1</sup> H} NMR spectrum of [Ir(Me <sub>3</sub> quinox) <sub>2</sub> (bipy-Im2)][PF <sub>6</sub> ] <sub>3</sub> (126 MHz, 293 K, CD <sub>3</sub> CN).                                            | 7  |
| Figure S10. HRMS of [Ir(Me <sub>3</sub> quinox) <sub>2</sub> (bipy-Im2)][PF <sub>6</sub> ] <sub>3</sub> (ES+). (Top - theoretical; bottom - experimental).                                                                       | 7  |
| Figure S11. <sup>1</sup> H NMR spectrum of [Ru-Au][PF <sub>6</sub> ] <sub>3</sub> (500 MHz, 293 K, CD <sub>3</sub> CN).                                                                                                          | 8  |
| Figure S12. <sup>13</sup> C{ <sup>1</sup> H} NMR spectrum of [Ru-Au][PF <sub>6</sub> ] <sub>3</sub> (126 MHz, 293 K, CD <sub>3</sub> CN).                                                                                        | 8  |
| Figure S13. <sup>31</sup> P{ <sup>1</sup> H} NMR spectrum of [Ru-Au][PF <sub>6</sub> ] <sub>3</sub> (202 MHz, 293 K, CD <sub>3</sub> CN).                                                                                        | 9  |
| Figure S14. HRMS of [Ru-Au][PF <sub>6</sub> ] <sub>3</sub> (ES+). (Top - theoretical; bottom - experimental).                                                                                                                    | 9  |
| Figure S15. <sup>1</sup> H NMR spectrum of [Ru-Au <sub>2</sub> ][PF <sub>6</sub> ] <sub>4</sub> (500 MHz, 293 K, CD <sub>3</sub> CN).                                                                                            | 10 |
| Figure S16. <sup>13</sup> C{ <sup>1</sup> H} NMR spectrum of [Ru-Au <sub>2</sub> ][PF <sub>6</sub> ] <sub>4</sub> (126 MHz, 293 K, CD <sub>3</sub> CN).                                                                          | 10 |
| Figure S17. <sup>31</sup> P{ <sup>1</sup> H} NMR spectrum of [Ru-Au <sub>2</sub> ][PF <sub>6</sub> ] <sub>4</sub> (202 MHz, 293 K, CD <sub>3</sub> CN).                                                                          | 11 |
| Figure S18. HRMS of [Ru-Au <sub>2</sub> ][PF <sub>6</sub> ] <sub>4</sub> (ES+). (Top - theoretical; bottom - experimental)                                                                                                       | 11 |
| Figure S19. <sup>1</sup> H NMR spectrum of [Ir-Au][PF <sub>6</sub> ] <sub>2</sub> (500 MHz, 293 K, CD <sub>3</sub> CN).                                                                                                          | 12 |
| Figure S20. <sup>13</sup> C{ <sup>1</sup> H} NMR spectrum of [Ir-Au][PF <sub>6</sub> ] <sub>2</sub> (126 MHz, 293 K, CD <sub>3</sub> CN).                                                                                        | 12 |
| Figure S21. <sup>31</sup> P{ <sup>1</sup> H} NMR spectrum of [Ir-Au][PF <sub>6</sub> ] <sub>2</sub> (202 MHz, 293 K, CD <sub>3</sub> CN).                                                                                        | 13 |
| Figure S22. HRMS of [Ir-Au][PF <sub>6</sub> ] <sub>2</sub> (ES+). (Top - theoretical; bottom - experimental).                                                                                                                    | 13 |
| Figure S23. <sup>1</sup> H NMR spectrum of [Ir-Au <sub>2</sub> ][PF <sub>6</sub> ] <sub>3</sub> (500 MHz, 293 K, CD <sub>3</sub> CN).                                                                                            | 14 |
| Figure S24. <sup>13</sup> C{ <sup>1</sup> H} NMR spectrum of [Ir-Au <sub>2</sub> ][PF <sub>6</sub> ] <sub>3</sub> (126 MHz, 293 K, CD <sub>3</sub> CN).                                                                          | 14 |
| Figure S25. <sup>31</sup> P{ <sup>1</sup> H} NMR spectrum of [Ir-Au <sub>2</sub> ][PF <sub>6</sub> ] <sub>3</sub> (202 MHz, 293 K, CD <sub>3</sub> CN).                                                                          | 15 |
| Figure S26. HRMS of [Ir-Au <sub>2</sub> ][PF <sub>6</sub> ] <sub>3</sub> (ES+). (Top - theoretical; bottom - experimental).                                                                                                      | 15 |
| Table S1. Crystals data and structure refinement for [Ir(Me <sub>3</sub> quinox) <sub>2</sub> (MeCN) <sub>2</sub> ][BF <sub>4</sub> ]                                                                                            | 16 |
| Figure S28. Single crystal X-ray structure of [Ir(Me <sub>3</sub> quinox) <sub>2</sub> (MeCN) <sub>2</sub> ][BF <sub>4</sub> ] (ellipsoids plotted at the 50% probability level; H-atoms and counter anions omitted for clarity) | 17 |
| Figure S29. Single crystal X-ray structure of [Ir(Me <sub>3</sub> quinox) <sub>2</sub> (MeCN) <sub>2</sub> ][BF <sub>4</sub> ] (ellipsoids plotted at the 50% probability level; counter anions omitted for clarity)             | 17 |
| Figure S30. Unit cell packing of [Ir(Me <sub>3</sub> quinox) <sub>2</sub> (MeCN) <sub>2</sub> ][BF <sub>4</sub> ] (ellipsoids plotted at the 50% probability level)                                                              | 18 |

|                                                                                                                                                                                                               |    |
|---------------------------------------------------------------------------------------------------------------------------------------------------------------------------------------------------------------|----|
| Table S2. Crystals data and structure refinement for $[\text{Ir}(\text{Me}_3\text{quinox})_2(\text{bipy-Im2})][\text{PF}_6]_3$                                                                                | 18 |
| Figure S32. Single crystal X-ray structure of $[\text{Ir}(\text{Me}_3\text{quinox})_2(\text{bipy-Im2})][\text{PF}_6]_3$ (ellipsoids plotted at the 50% probability level; counter anions omitted for clarity) | 19 |
| Figure S33. Single crystal X-ray structure of $[\text{Ir}(\text{Me}_3\text{quinox})_2(\text{bipy-Im2})][\text{PF}_6]_3$ (ellipsoids plotted at the 50% probability level)                                     | 19 |
| Figure S34. Unit cell packing of $[\text{Ir}(\text{Me}_3\text{quinox})_2(\text{bipy-Im2})][\text{PF}_6]_3$ (ellipsoids plotted at the 50% probability level)                                                  | 20 |
| Figure S35. Single crystal X-ray structure of $[\text{Ru-Au}][\text{PF}_6]_3$ (ellipsoids plotted at the 50% probability level; counter anions and disorder omitted for clarity)                              | 21 |
| Figure S36. Single crystal X-ray structure of $[\text{Ru-Au}][\text{PF}_6]_3$ (ellipsoids plotted at the 50% probability level; counter anions omitted for clarity)                                           | 21 |
| Figure S37. Unit cell packing of $[\text{Ru-Au}][\text{PF}_6]_3$ (ellipsoids plotted at the 50% probability level)                                                                                            | 22 |
| Table S3. Crystal data and structure refinement for $[\text{Ru-Au}][\text{PF}_6]_3$                                                                                                                           | 22 |
| Table S5. Bond metrics for $[\text{Ru-Au}][\text{PF}_6]_3$                                                                                                                                                    | 23 |
| Figure S38. Absorption spectra for the polycationic iridium complexes (293 K, aerated MeCN, $10^{-5}$ M).                                                                                                     | 23 |
| Table S6. Electrode oxidation potentials of the family of homo- and heterometallic complexes (mV shifts presented in parentheses)                                                                             | 24 |
| Figure S39. Cyclic voltammograms for the family of monometallic Ir/Ru heteropolymetallic Ir/Ru-Au complexes                                                                                                   | 24 |
| References                                                                                                                                                                                                    | 25 |
|                                                                                                                                                                                                               | 25 |

## S1 NMR and high-resolution mass spectra

### S1.1 $[\text{Ir}(\text{Me}_3\text{quinox})_2(\mu_2\text{-Cl})]_2$

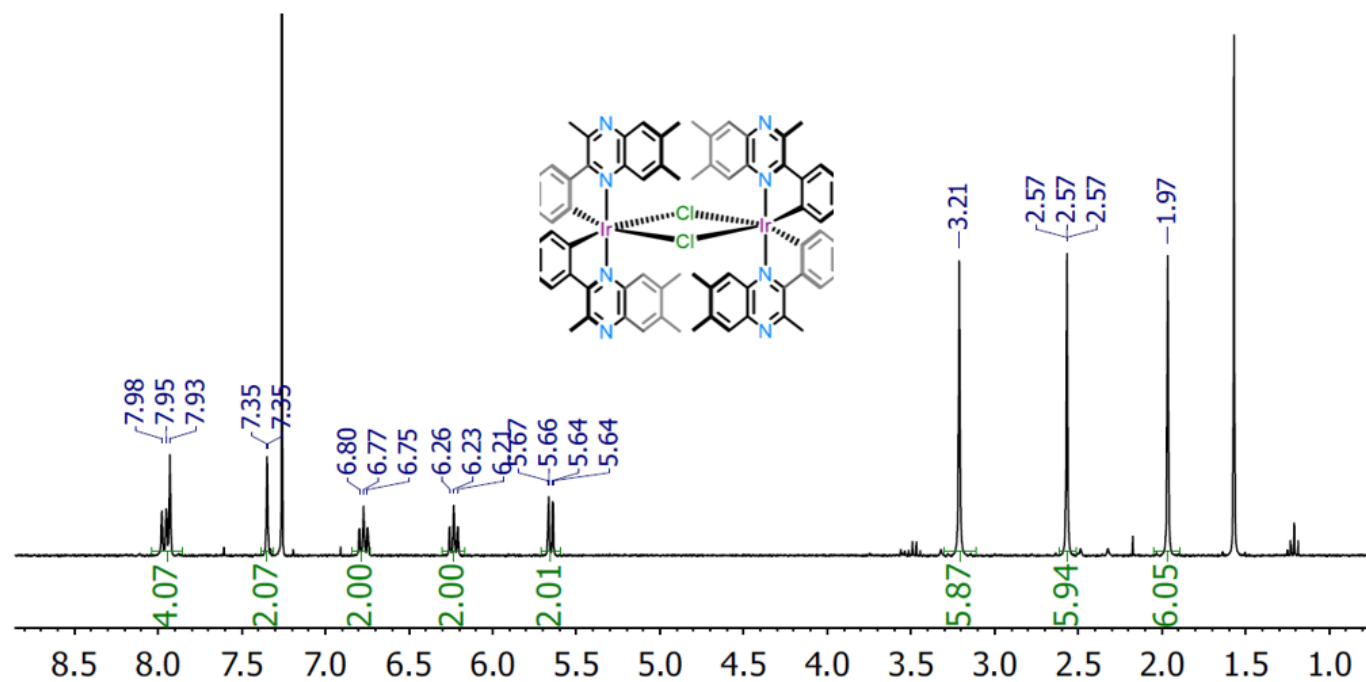

Figure S1.  $^1\text{H}$  NMR spectrum (300 MHz, 293 K,  $\text{CDCl}_3$ ) of dimeric  $[\text{Ir}(\text{Me}_3\text{quinox})_2(\mu_2\text{-Cl})]_2$ .

### S1.2 $[\text{Ir}(\text{Me}_3\text{quinox})_2(\text{MeCN})_2][\text{PF}_6]$

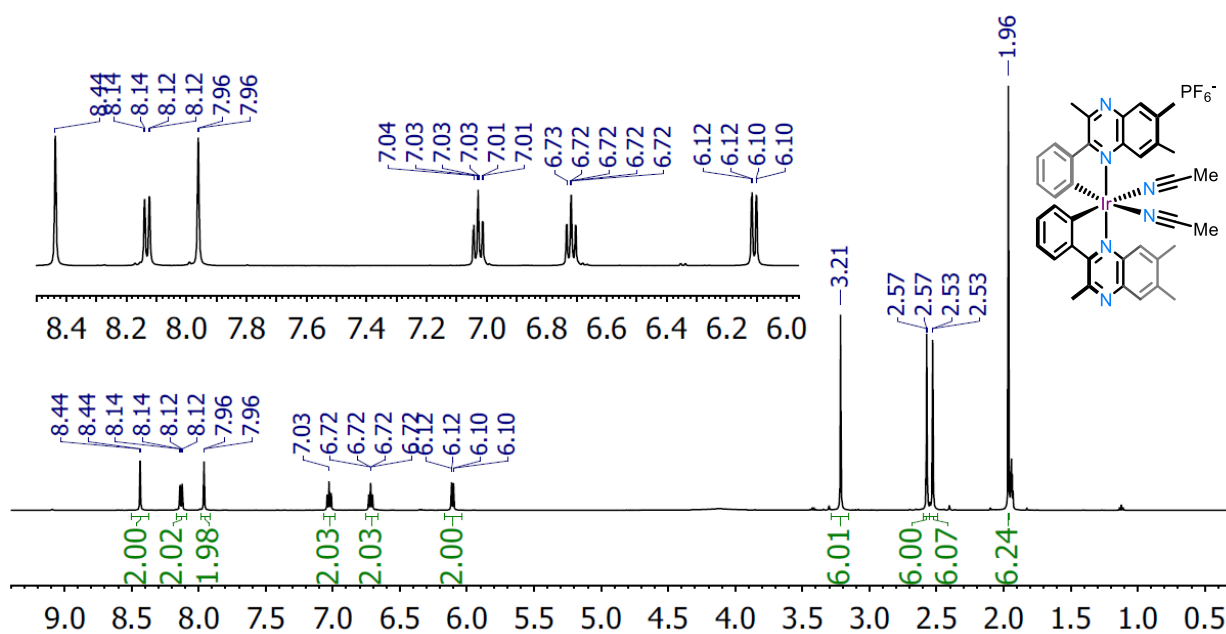

Figure S2.  $^1\text{H}$  NMR spectrum of  $[\text{Ir}(\text{Me}_3\text{quinox})_2(\text{MeCN})_2][\text{PF}_6]$  (500 MHz, 293 K,  $\text{CD}_3\text{CN}$ ).

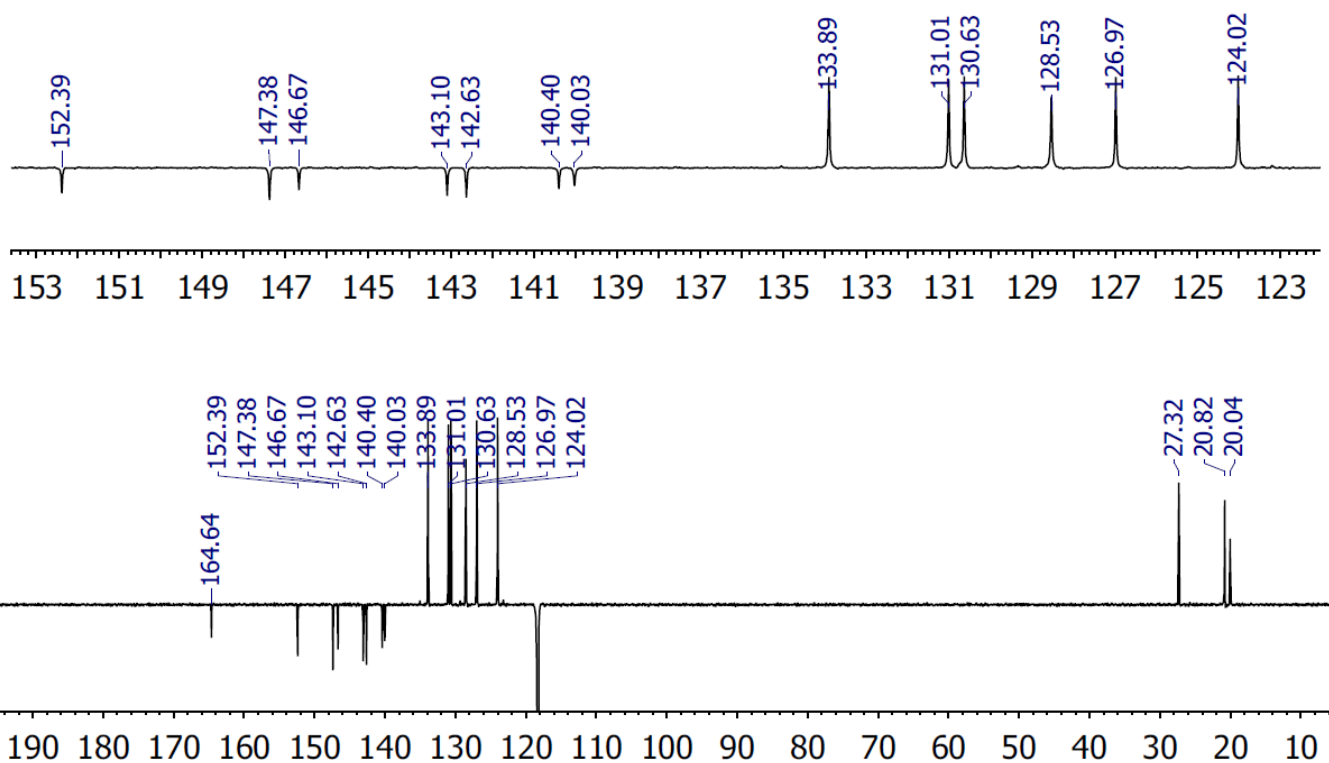

**Figure S3.**  $^{13}\text{C}\{^1\text{H}\}$  NMR spectrum of  $[\text{Ir}(\text{Me}_3\text{quinox})_2(\text{MeCN})_2][\text{PF}_6]$  (500 MHz, 293 K,  $\text{CD}_3\text{CN}$ ).

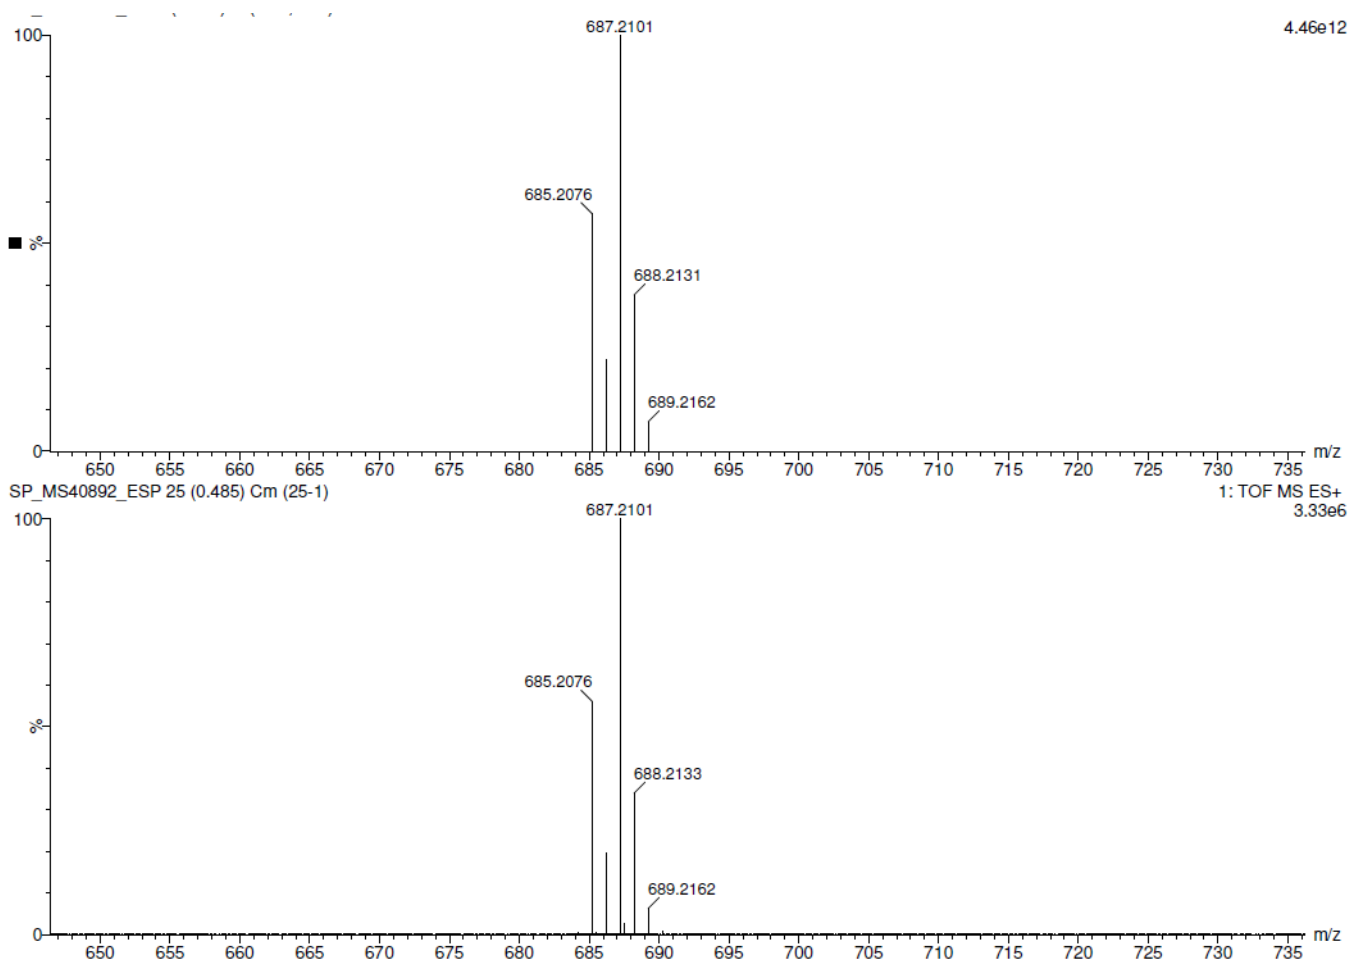

**Figure S4.** HRMS of  $[\text{Ir}(\text{Me}_3\text{quinox})_2(\text{MeCN})_2][\text{PF}_6]$  (ES+). (Top - theoretical; bottom - experimental).

S1.3 [Ir(Me<sub>3</sub>quinox)<sub>2</sub>(bipy-lm1)][PF<sub>6</sub>]<sub>2</sub>

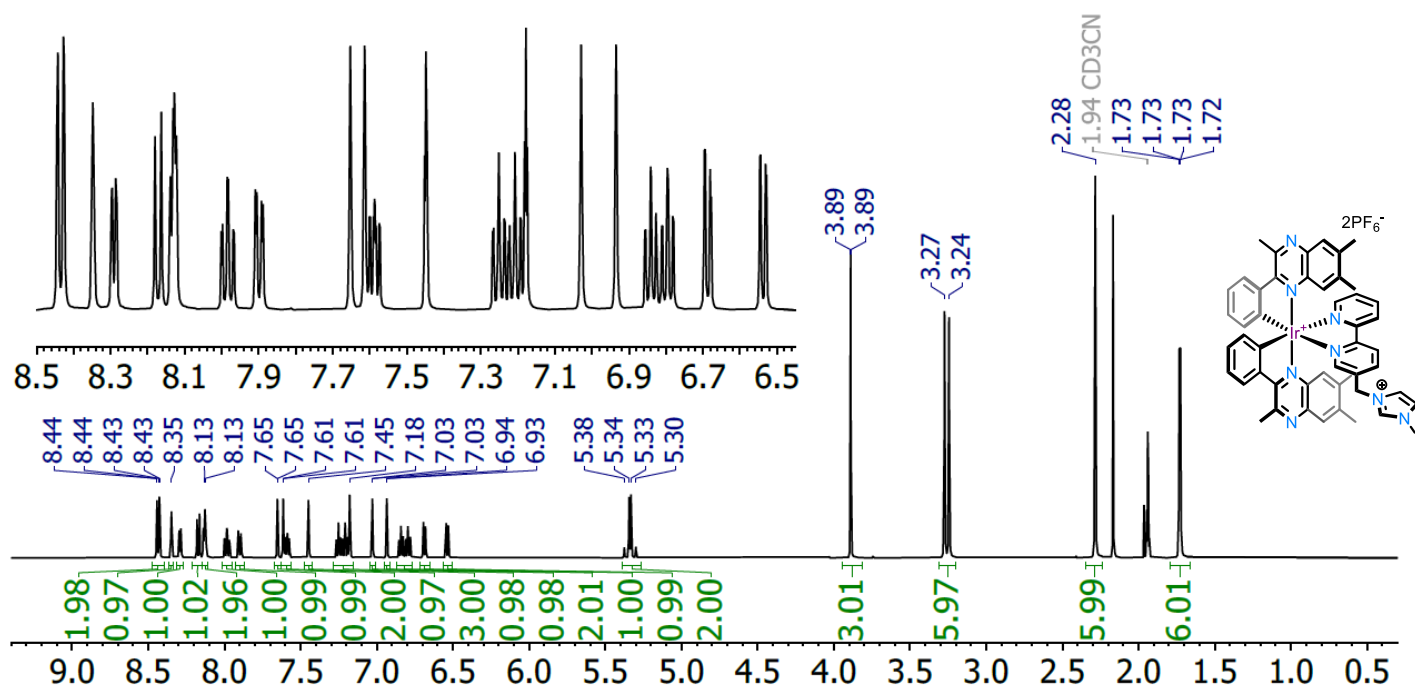

Figure S5. <sup>1</sup>H NMR spectrum of [Ir(Me<sub>3</sub>quinox)<sub>2</sub>(bipy-lm1)][PF<sub>6</sub>]<sub>2</sub> (500 MHz, 293 K, CD<sub>3</sub>CN).

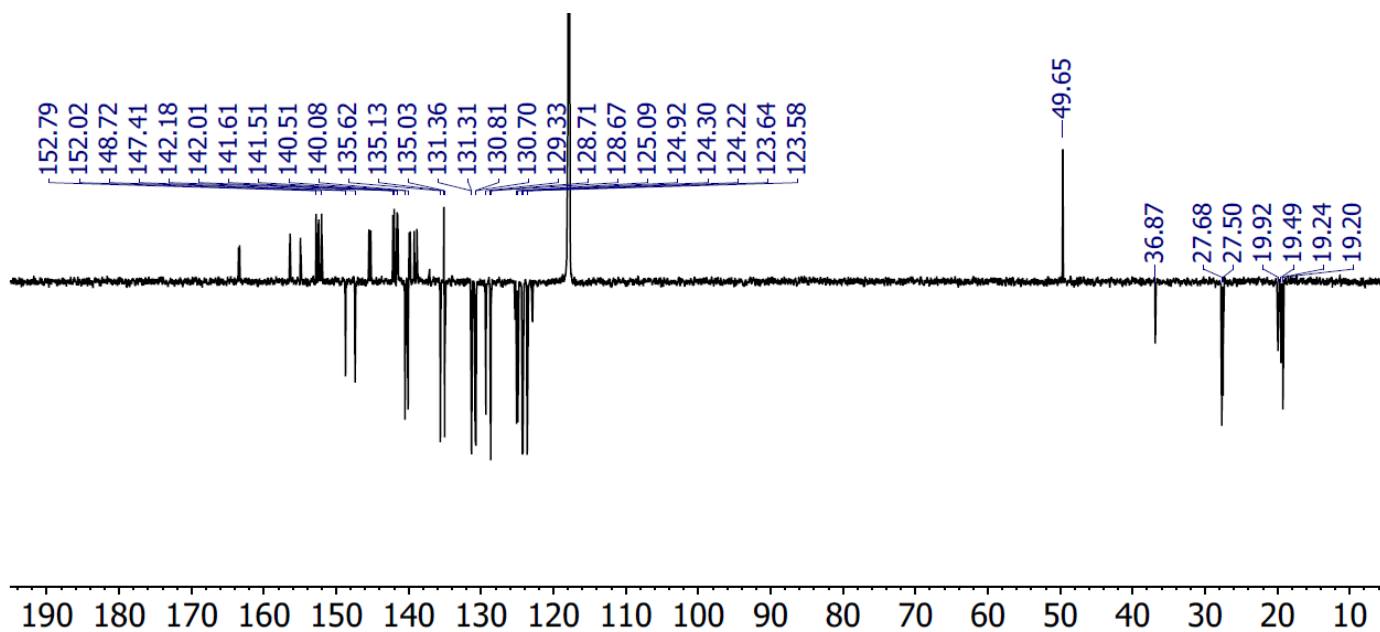

Figure S6. <sup>13</sup>C{<sup>1</sup>H} NMR spectrum of [Ir(Me<sub>3</sub>quinox)<sub>2</sub>(bipy-lm1)][PF<sub>6</sub>]<sub>2</sub> (126 MHz, 293 K, CD<sub>3</sub>CN).

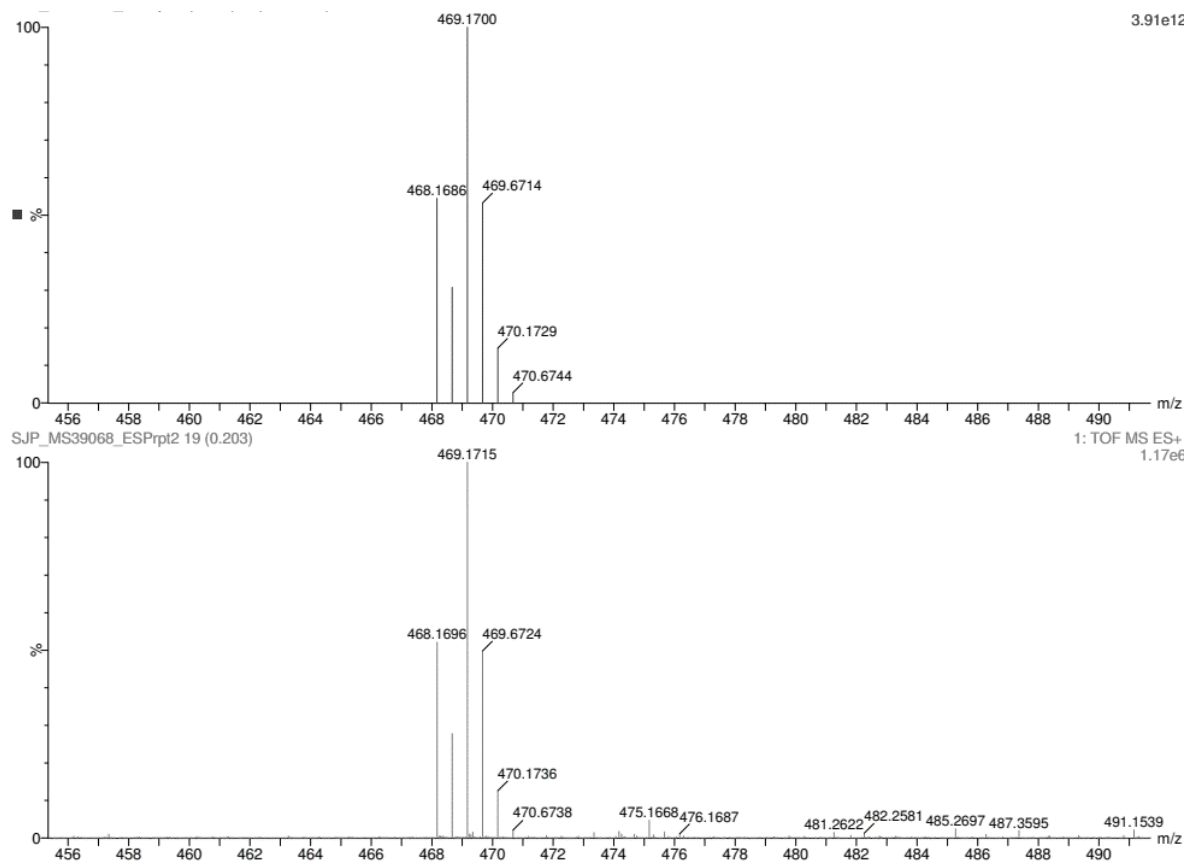

**Figure S7.** HRMS of  $[\text{Ir}(\text{Me}_3\text{quinox})_2(\text{bipy-Im1})][\text{PF}_6]_2$  (ES<sup>+</sup>). (Top - theoretical; bottom - experimental).

### S1.3 $[\text{Ir}(\text{Me}_3\text{quinox})_2(\text{bipy-Im2})][\text{PF}_6]_3$

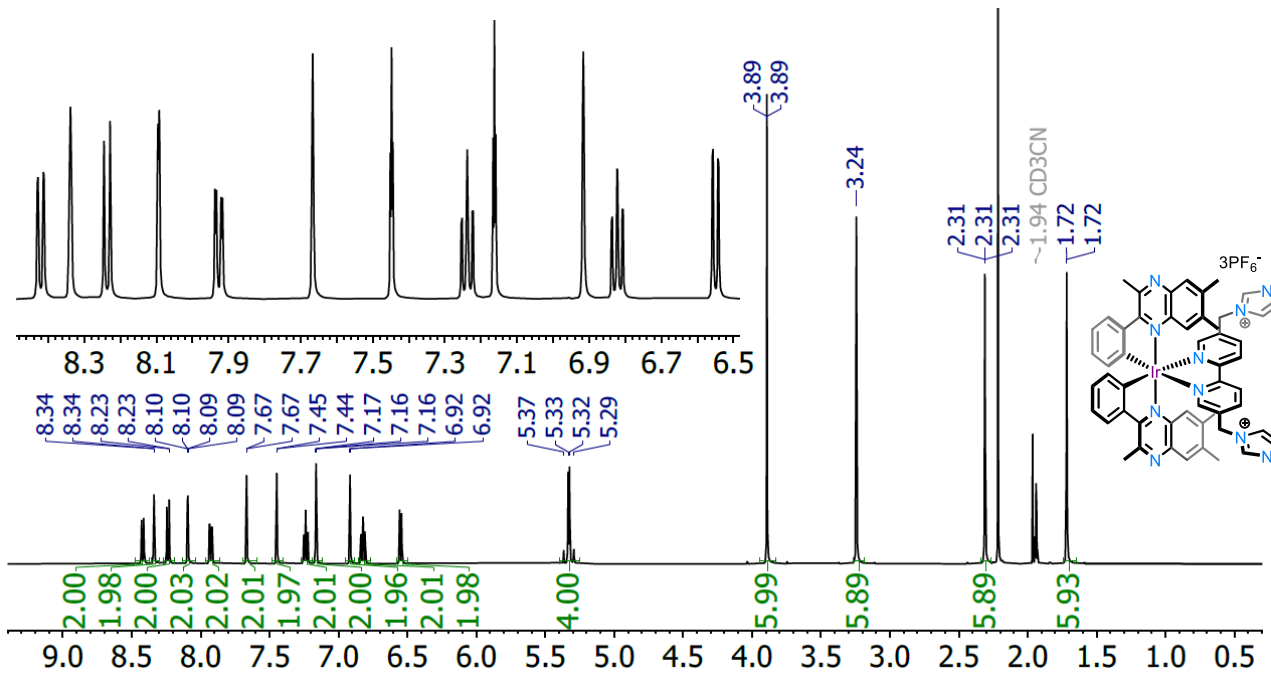

**Figure S8.**  $^1\text{H}$  NMR spectrum of  $[\text{Ir}(\text{Me}_3\text{quinox})_2(\text{bipy-Im2})][\text{PF}_6]_3$  (500 MHz, 293 K,  $\text{CD}_3\text{CN}$ ).

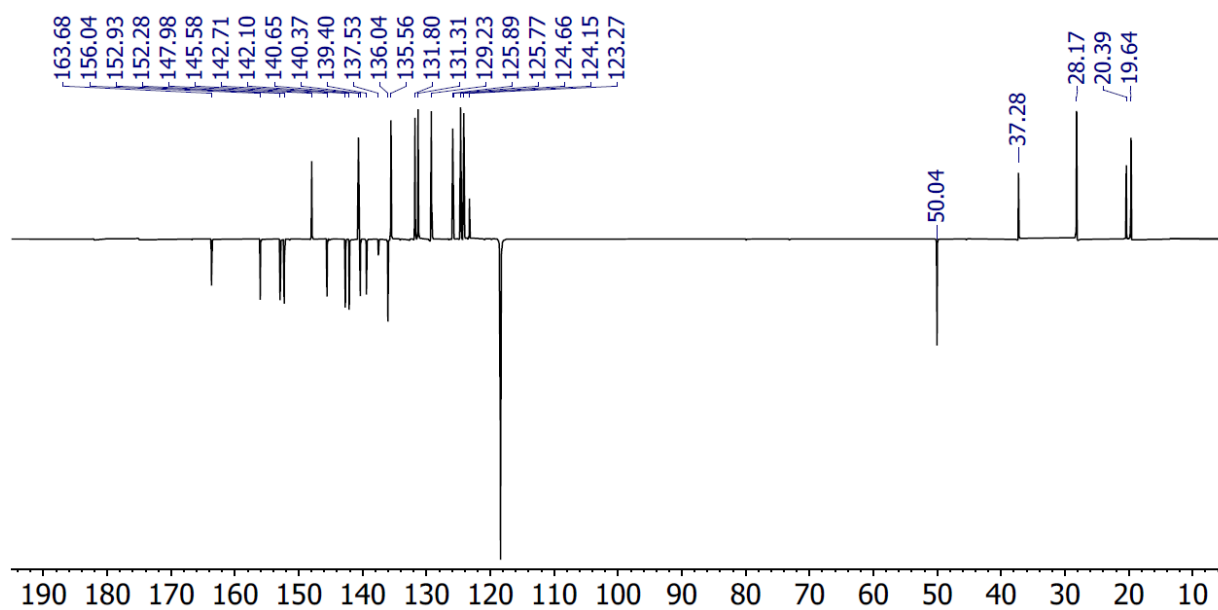

**Figure S9.**  $^{13}\text{C}\{^1\text{H}\}$  NMR spectrum of  $[\text{Ir}(\text{Me}_3\text{quinox})_2(\text{bipy-Im}_2)][\text{PF}_6]_3$  (126 MHz, 293 K,  $\text{CD}_3\text{CN}$ ).

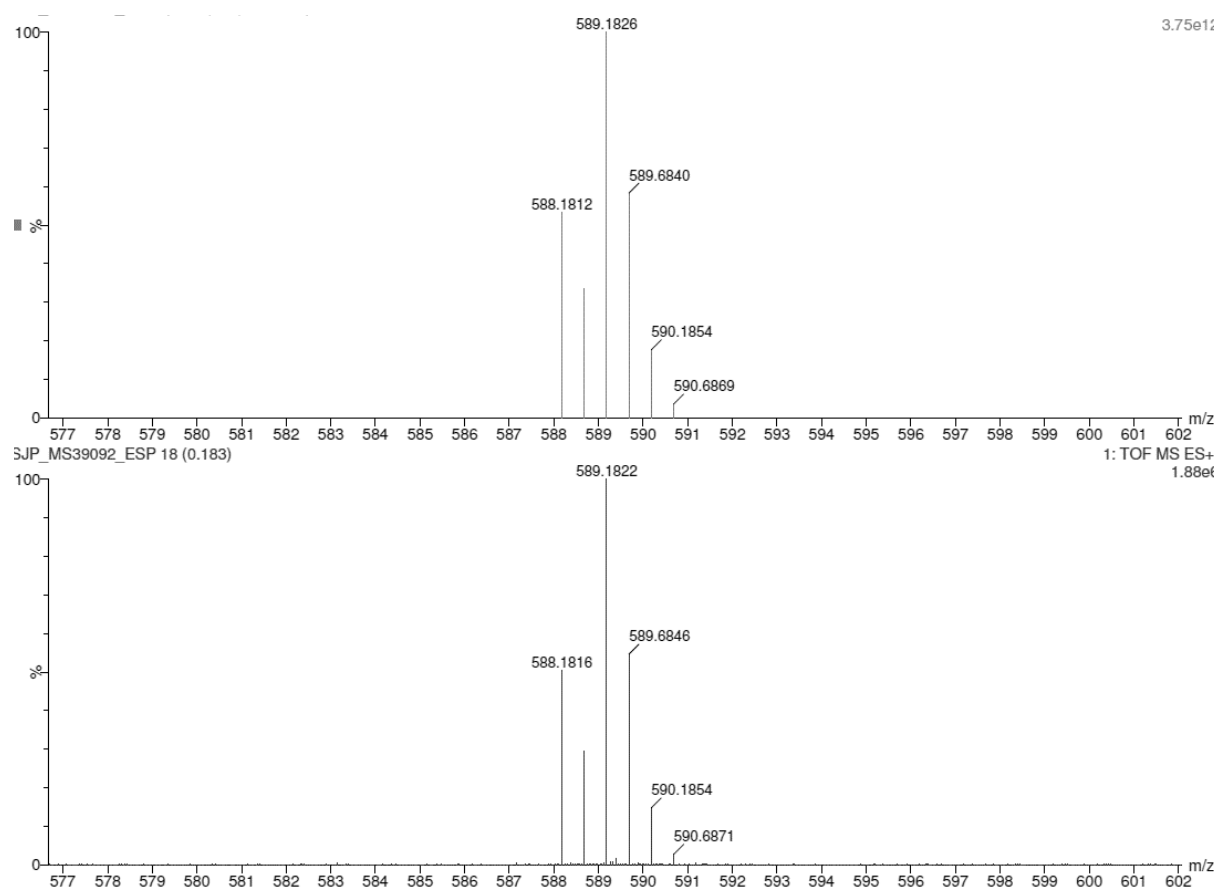

**Figure S10.** HRMS of  $[\text{Ir}(\text{Me}_3\text{quinox})_2(\text{bipy-Im}_2)][\text{PF}_6]_3$  (ES+). (Top - theoretical; bottom - experimental).

S1.4 [Ru-Au][PF<sub>6</sub>]<sub>3</sub>

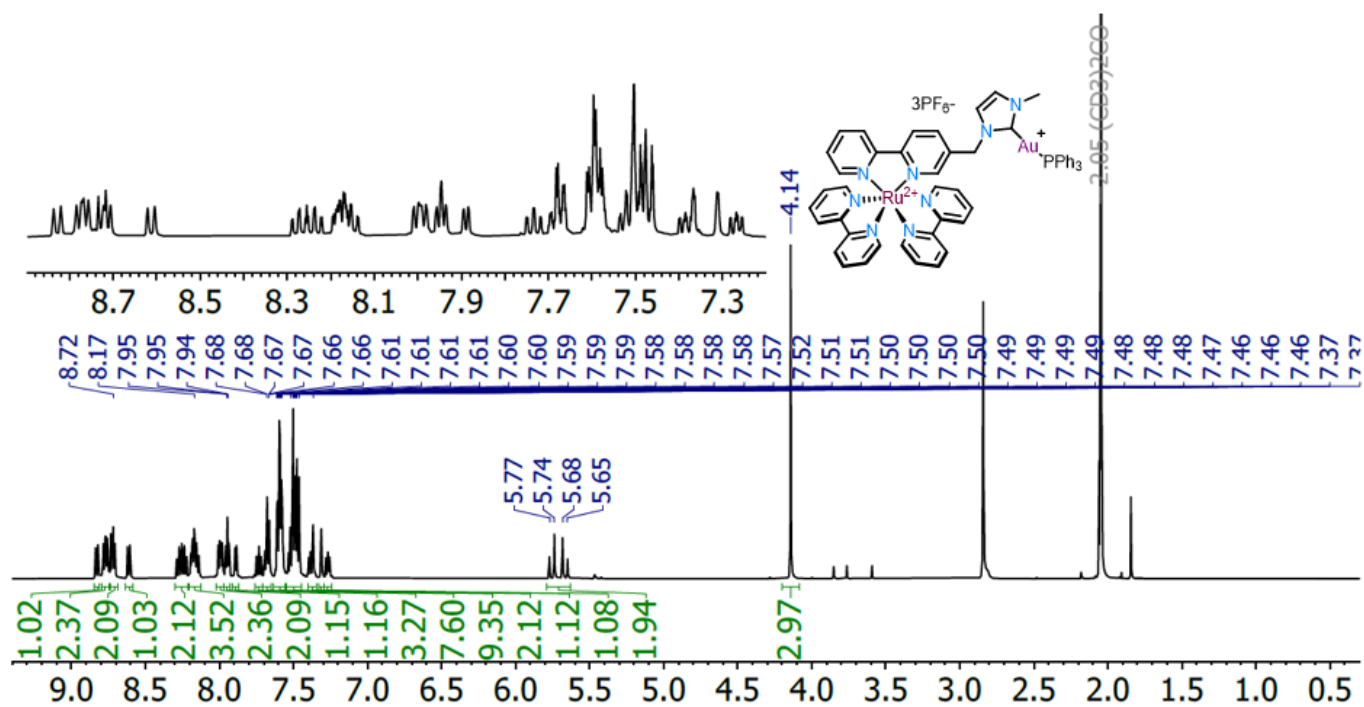

Figure S11. <sup>1</sup>H NMR spectrum of [Ru-Au][PF<sub>6</sub>]<sub>3</sub> (500 MHz, 293 K, CD<sub>3</sub>CN).

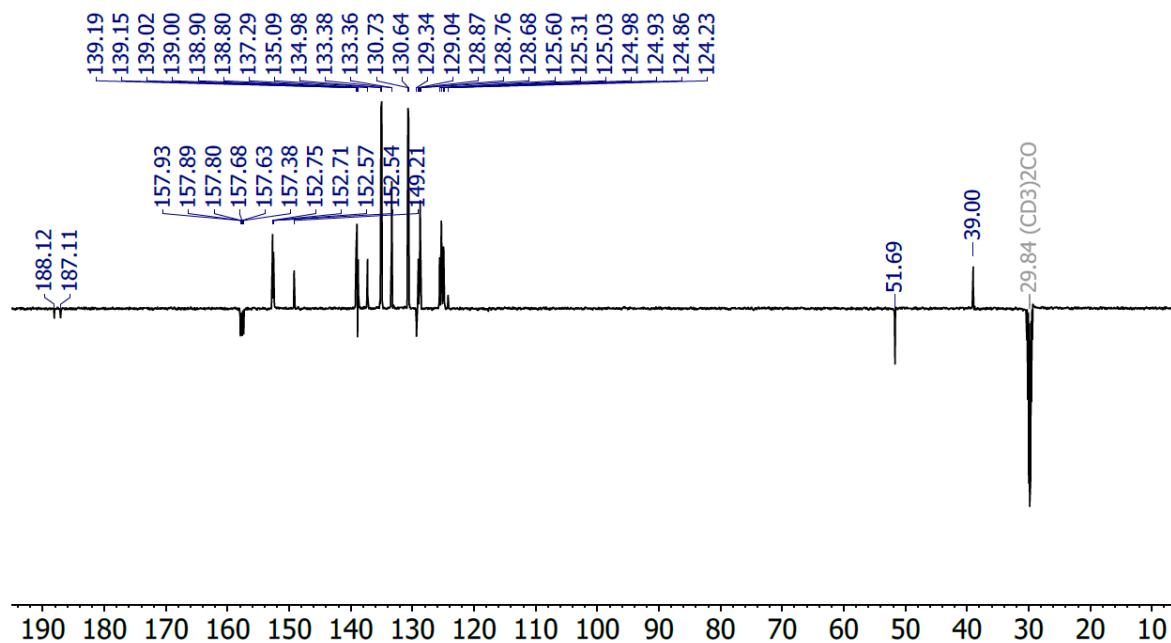

Figure S12. <sup>13</sup>C{<sup>1</sup>H} NMR spectrum of [Ru-Au][PF<sub>6</sub>]<sub>3</sub> (126 MHz, 293 K, CD<sub>3</sub>CN).



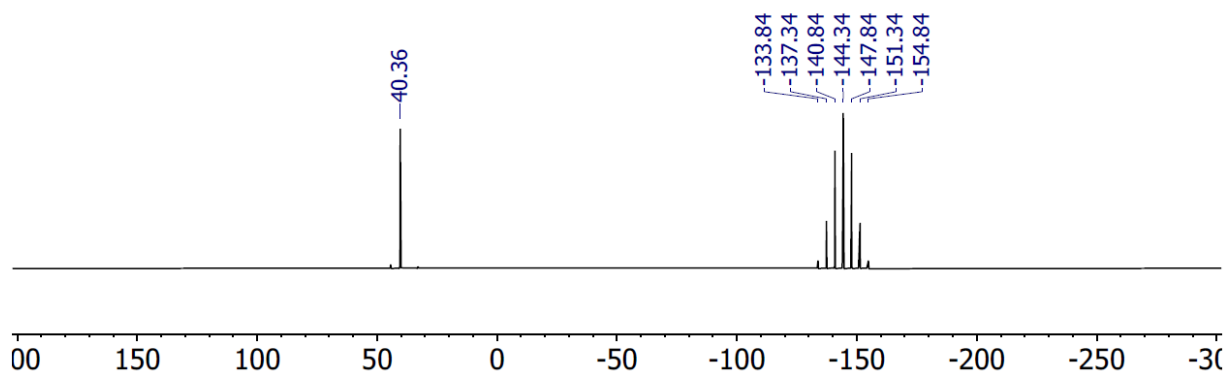

**Figure S13.**  $^{31}\text{P}\{^1\text{H}\}$  NMR spectrum of  $[\text{Ru-Au}][\text{PF}_6]_3$  (202 MHz, 293 K,  $\text{CD}_3\text{CN}$ ).

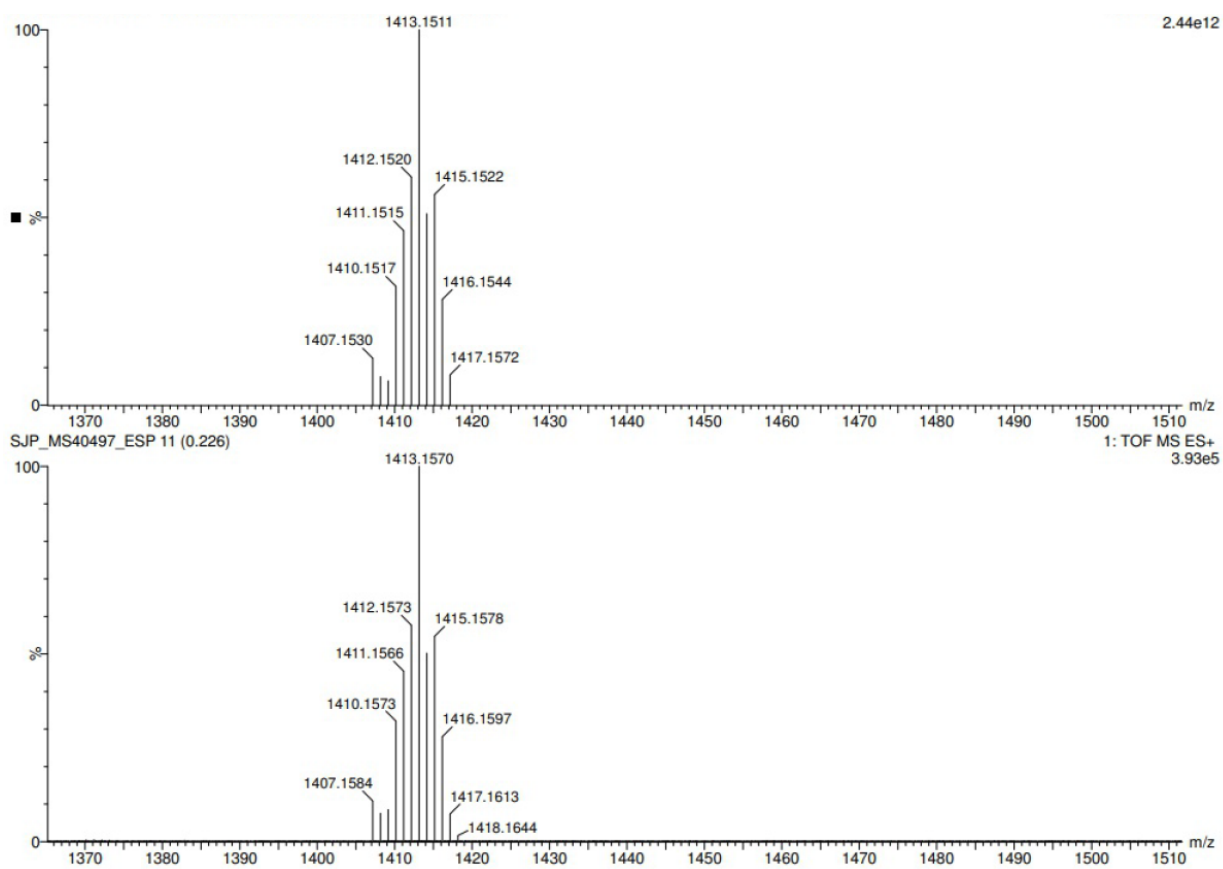

**Figure S14.** HRMS of  $[\text{Ru-Au}][\text{PF}_6]_3$  (ES+). (Top - theoretical; bottom - experimental).

### S1.5 [Ru-Au<sub>2</sub>][PF<sub>6</sub>]<sub>4</sub>

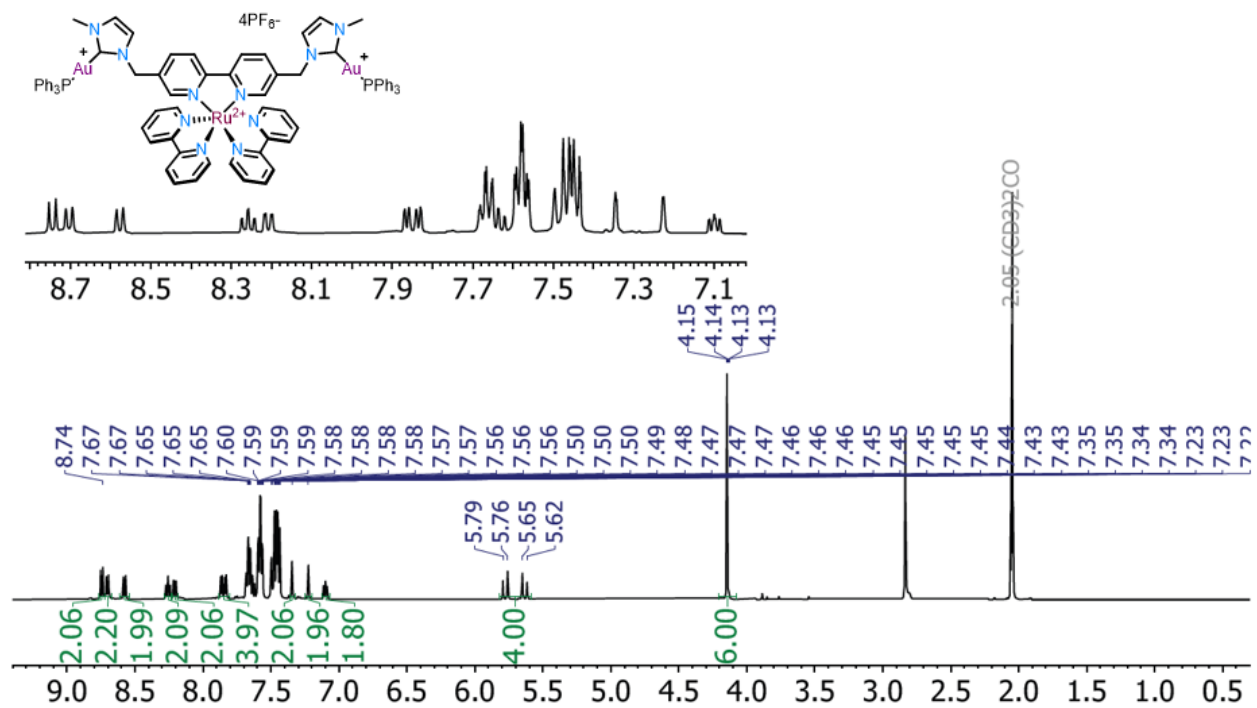

Figure S15. <sup>1</sup>H NMR spectrum of [Ru-Au<sub>2</sub>][PF<sub>6</sub>]<sub>4</sub> (500 MHz, 293 K, CD<sub>3</sub>CN).

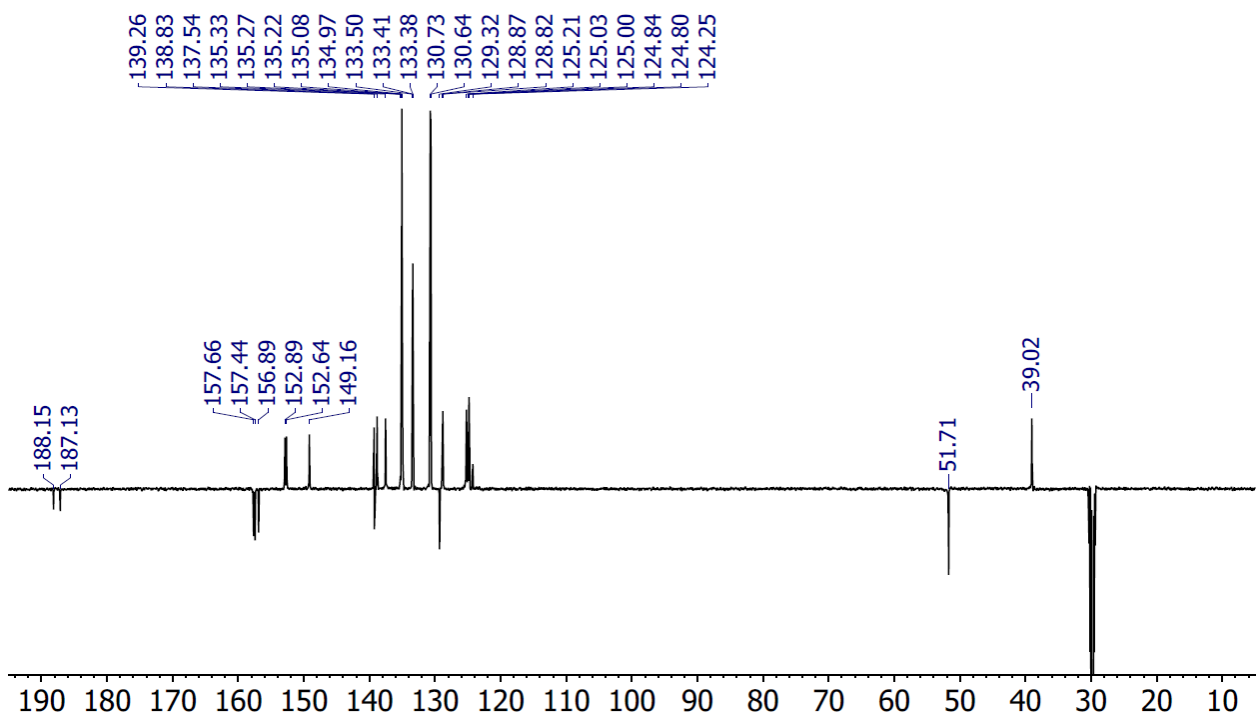

Figure S16. <sup>13</sup>C{<sup>1</sup>H} NMR spectrum of [Ru-Au<sub>2</sub>][PF<sub>6</sub>]<sub>4</sub> (126 MHz, 293 K, CD<sub>3</sub>CN).

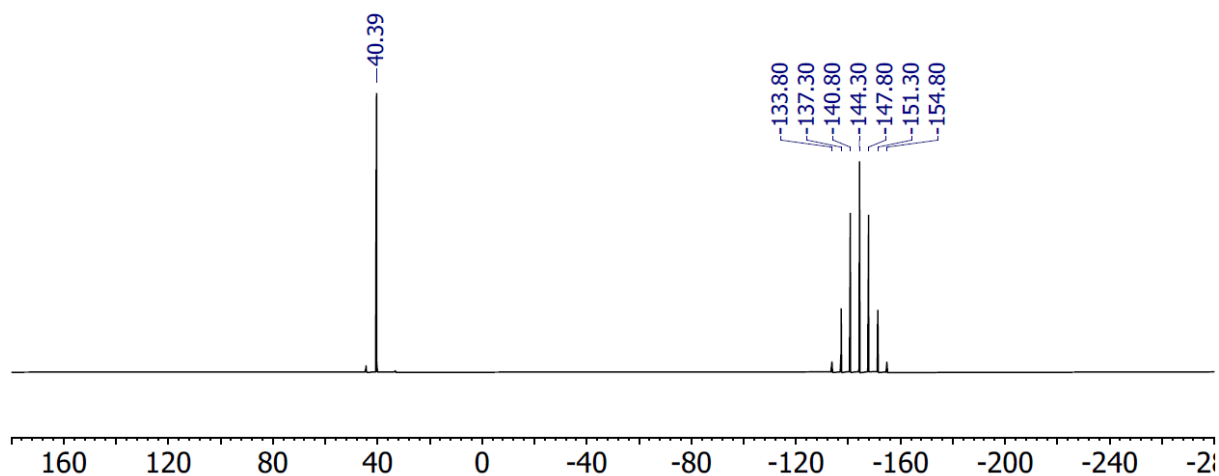

**Figure S17.**  $^{31}\text{P}\{^1\text{H}\}$  NMR spectrum of  $[\text{Ru-Au}_2][\text{PF}_6]_4$  (202 MHz, 293 K,  $\text{CD}_3\text{CN}$ ).

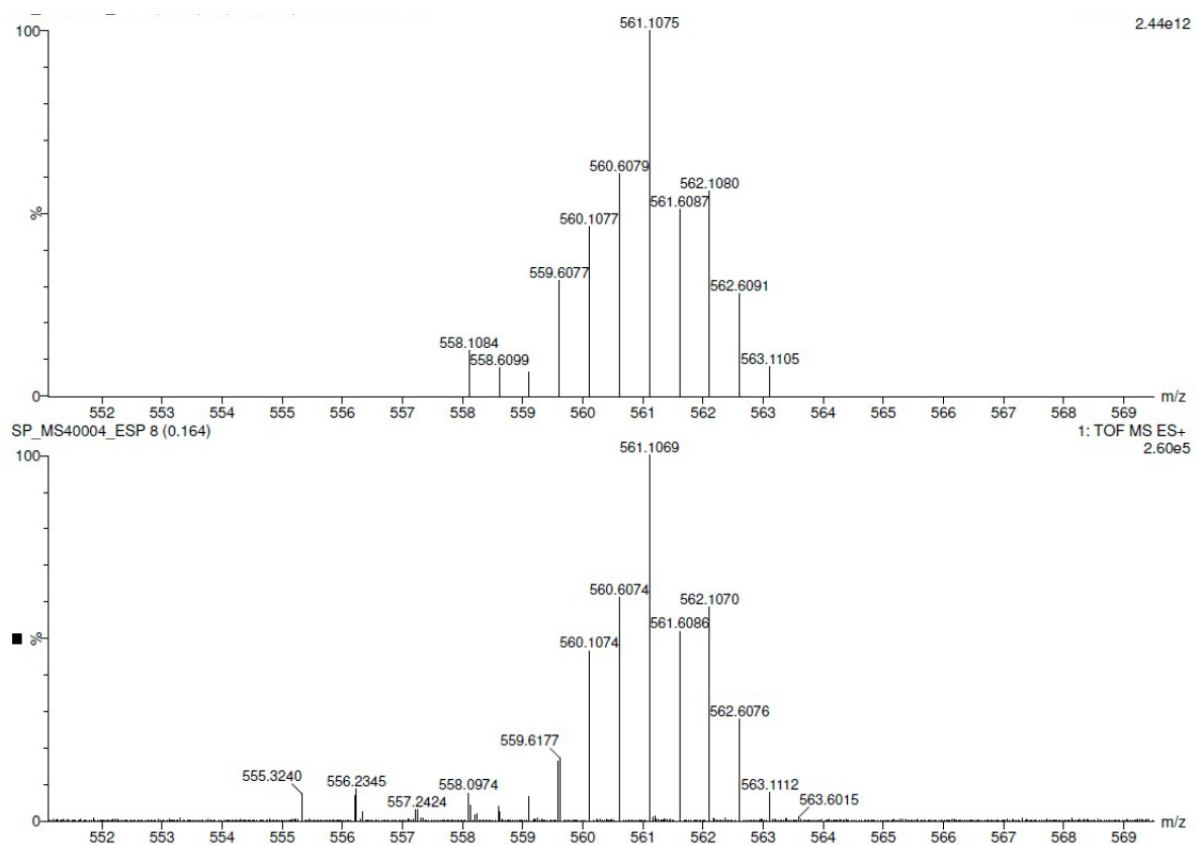

**Figure S18.** HRMS of  $[\text{Ru-Au}_2][\text{PF}_6]_4$  (ES $^+$ ). (Top - theoretical; bottom - experimental).

S1.6 [Ir-Au][PF<sub>6</sub>]<sub>2</sub>

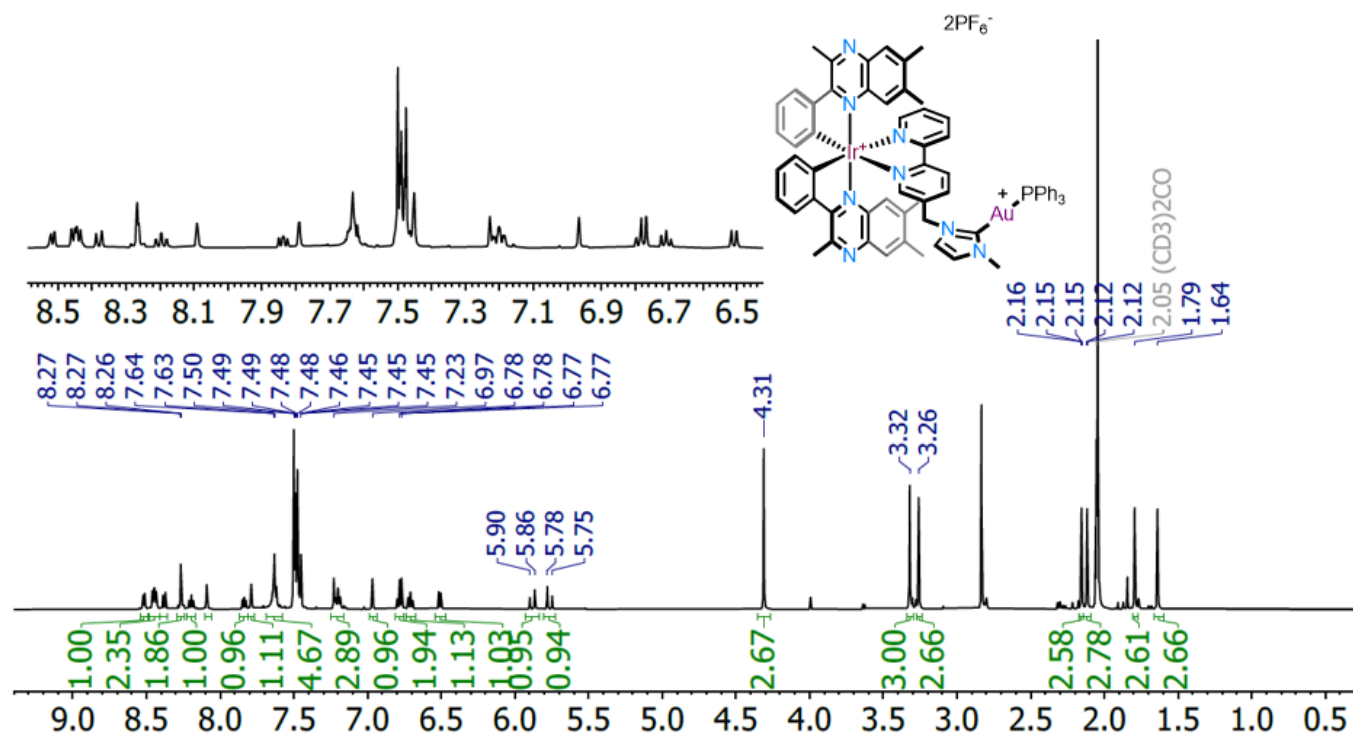

Figure S19. <sup>1</sup>H NMR spectrum of [Ir-Au][PF<sub>6</sub>]<sub>2</sub> (500 MHz, 293 K, CD<sub>3</sub>CN).

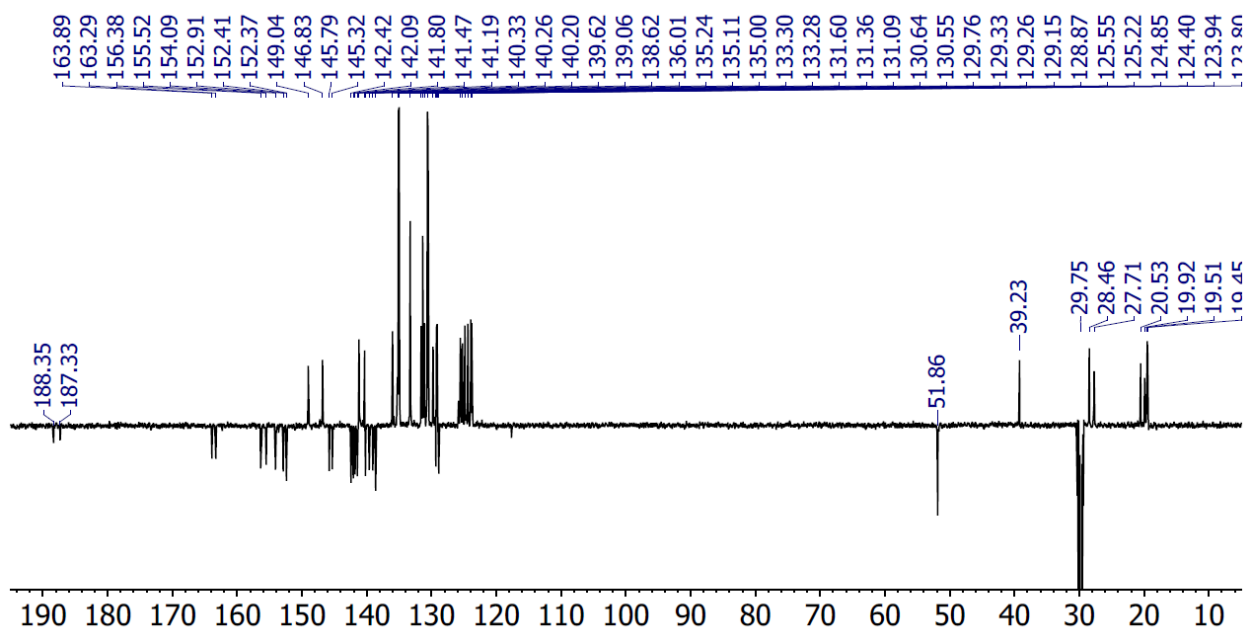

Figure S20. <sup>13</sup>C{<sup>1</sup>H} NMR spectrum of [Ir-Au][PF<sub>6</sub>]<sub>2</sub> (126 MHz, 293 K, CD<sub>3</sub>CN).

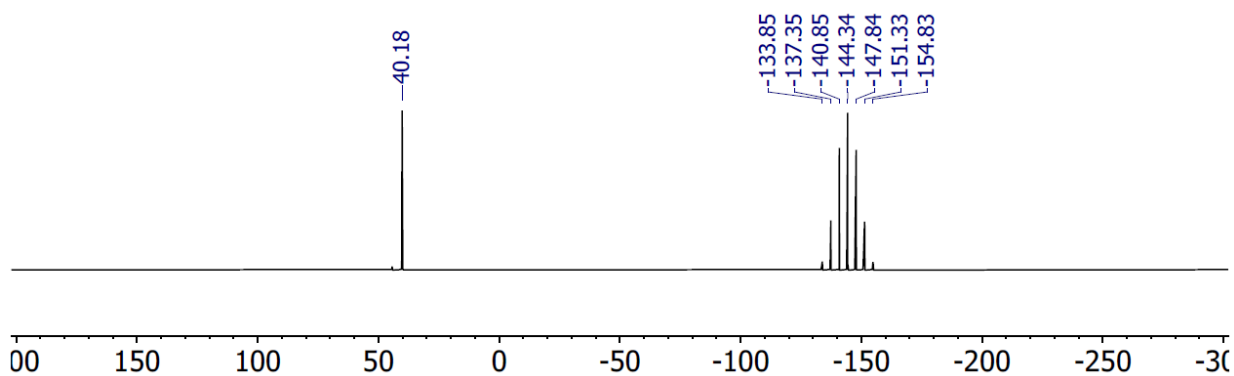

**Figure S21.**  $^{31}\text{P}\{^1\text{H}\}$  NMR spectrum of  $[\text{Ir-Au}][\text{PF}_6]_2$  (202 MHz, 293 K,  $\text{CD}_3\text{CN}$ ).

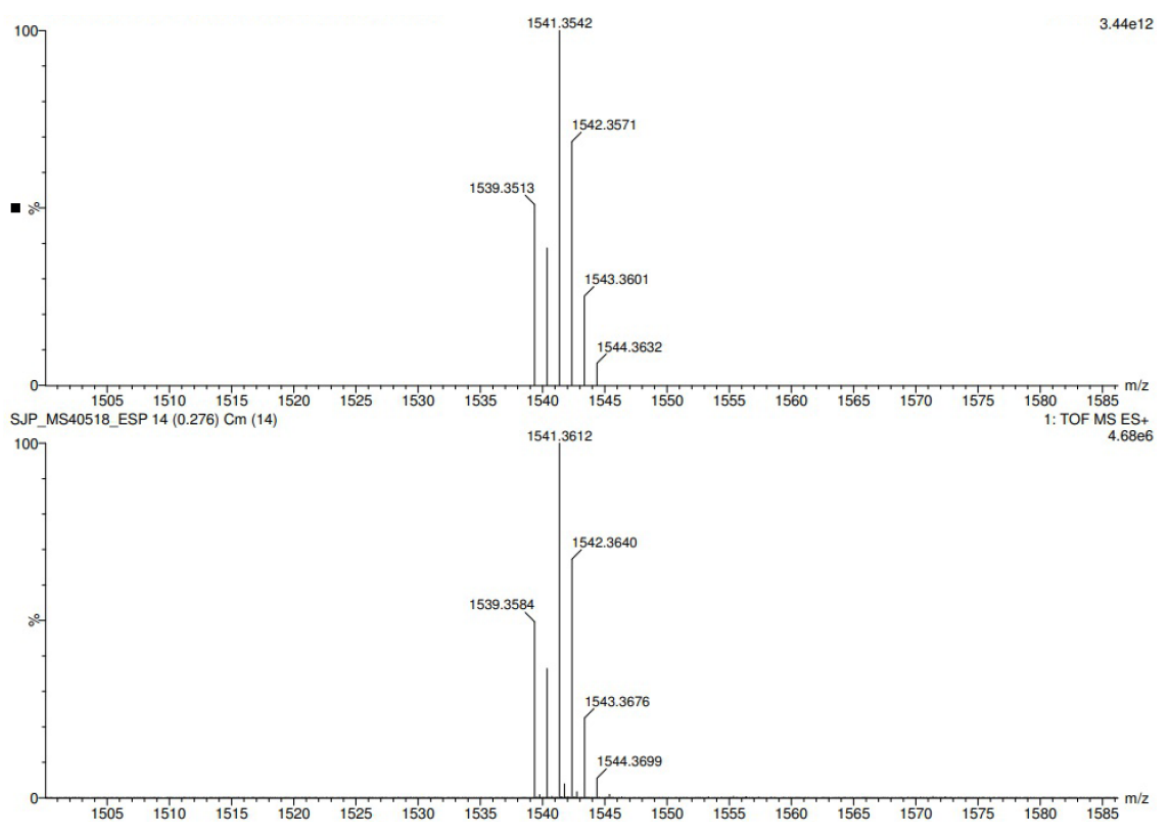

**Figure S22.** HRMS of  $[\text{Ir-Au}][\text{PF}_6]_2$  (ES+). (Top - theoretical; bottom - experimental).

S1.7 [Ir-Au<sub>2</sub>][PF<sub>6</sub>]<sub>3</sub>

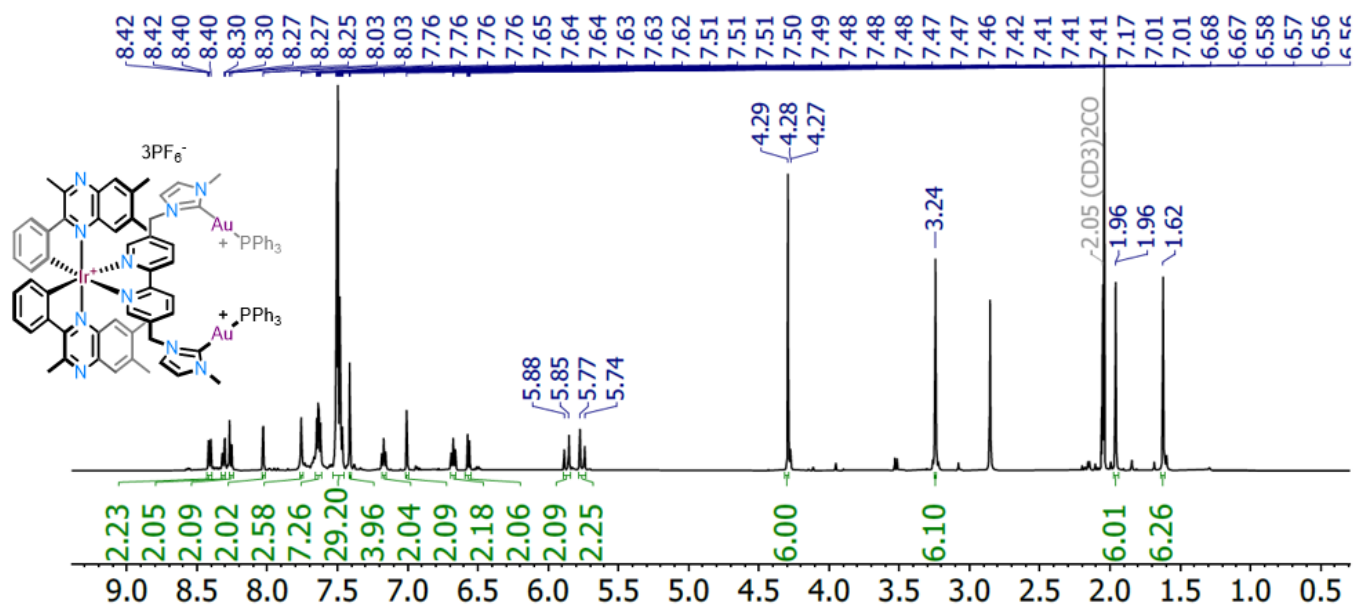

Figure S23. <sup>1</sup>H NMR spectrum of [Ir-Au<sub>2</sub>][PF<sub>6</sub>]<sub>3</sub> (500 MHz, 293 K, CD<sub>3</sub>CN).

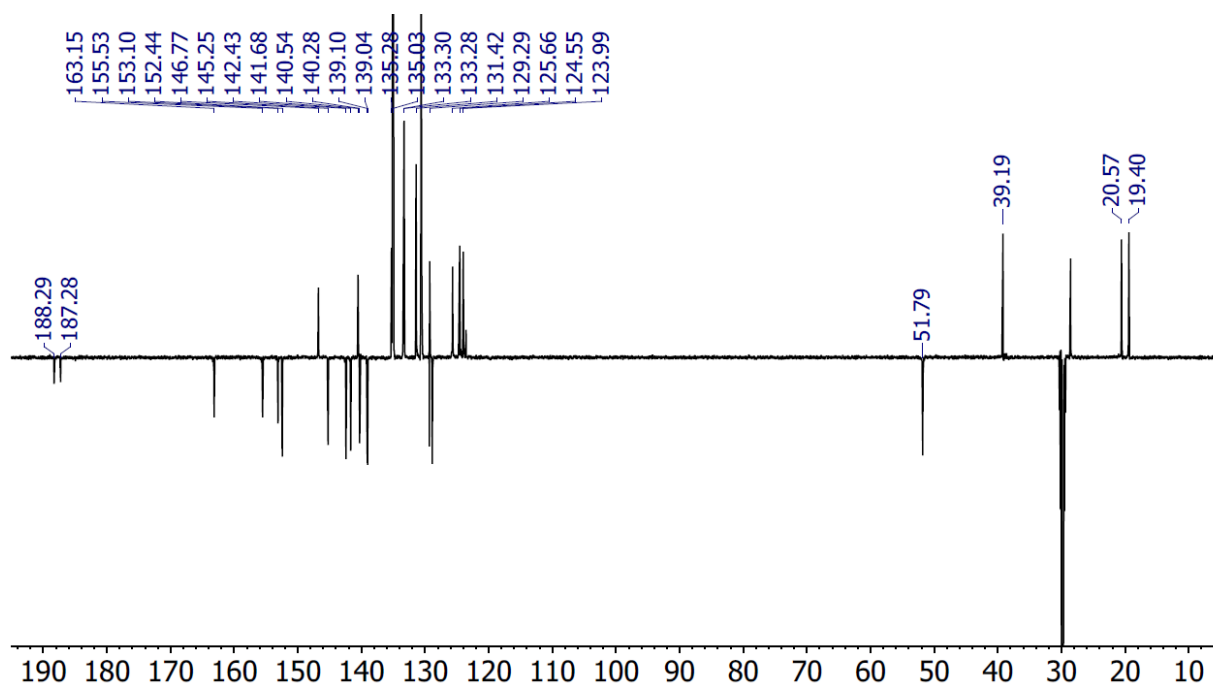

Figure S24. <sup>13</sup>C{<sup>1</sup>H} NMR spectrum of [Ir-Au<sub>2</sub>][PF<sub>6</sub>]<sub>3</sub> (126 MHz, 293 K, CD<sub>3</sub>CN).

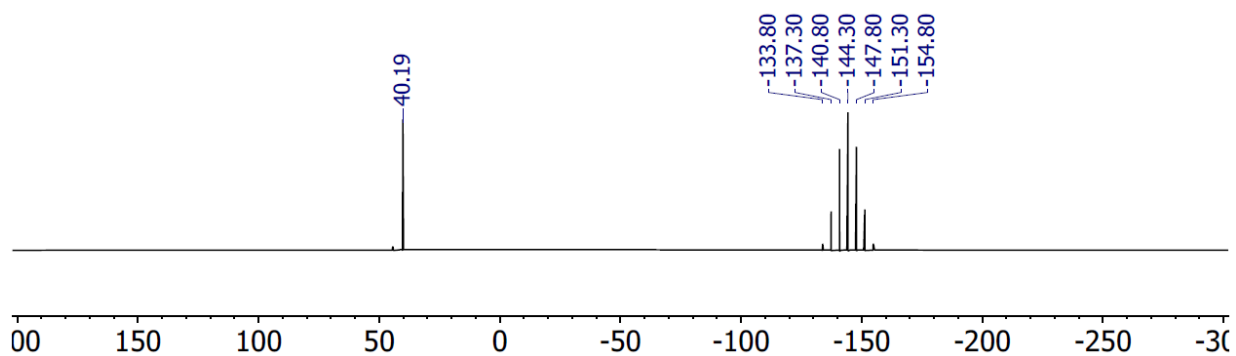

**Figure S25.**  $^{31}\text{P}\{^1\text{H}\}$  NMR spectrum of  $[\text{Ir-Au}_2][\text{PF}_6]_3$  (202 MHz, 293 K,  $\text{CD}_3\text{CN}$ ).

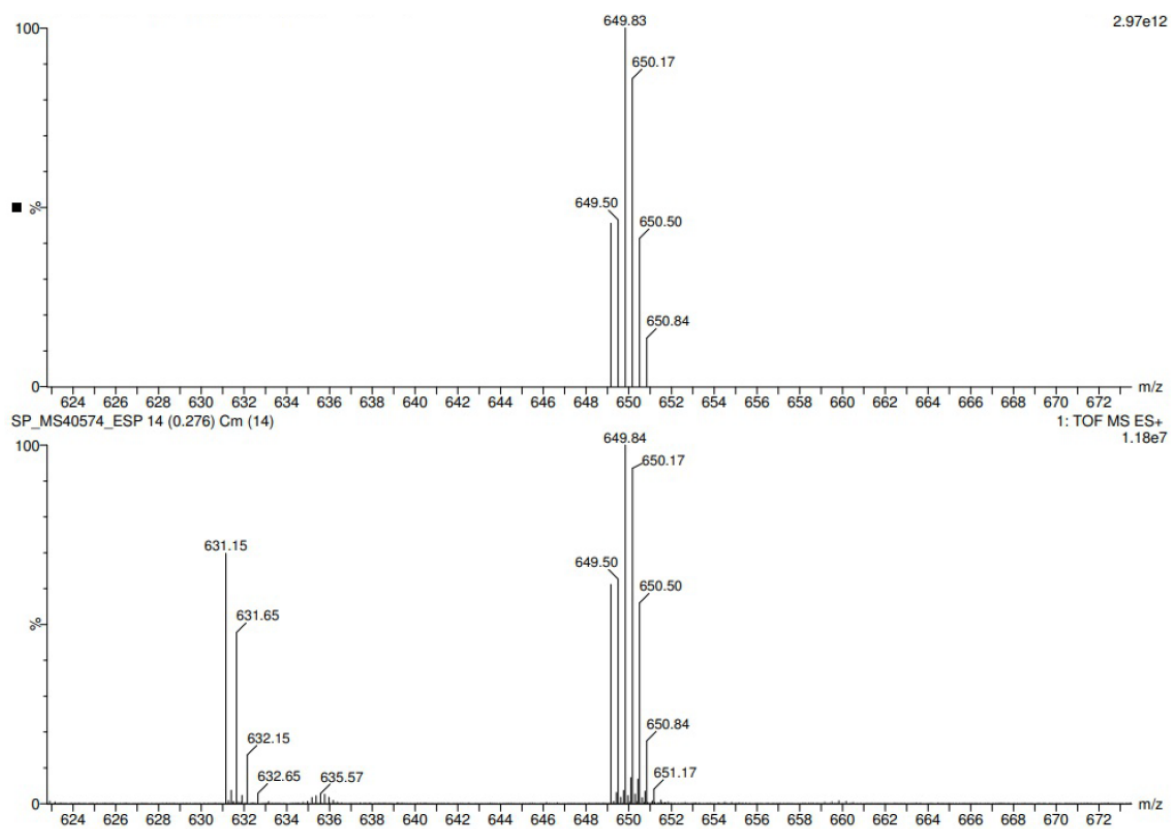

**Figure S26.** HRMS of  $[\text{Ir-Au}_2][\text{PF}_6]_3$  (ES+). (Top - theoretical; bottom - experimental).

## S2. Single-crystal X-ray crystallography

A suitable crystal was mounted on a glass fibre with Fomblin oil and collected at 150(2) K. The structure was solved using Olex2<sup>1</sup> and the ShelXT<sup>2</sup> structure solution program using Direct Methods and refined with the ShelXL<sup>3</sup> refinement package using Least Squares refinement.

### S2.1 Structure of [Ir(Me<sub>3</sub>quinox)<sub>2</sub>(MeCN)<sub>2</sub>][PF<sub>6</sub>]

**Table S1.** Crystals data and structure refinement for [Ir(Me<sub>3</sub>quinox)<sub>2</sub>(MeCN)<sub>2</sub>][PF<sub>6</sub>]

| Identification code                         | [Ir(Me <sub>3</sub> quinox) <sub>2</sub> (MeCN) <sub>2</sub> ][PF <sub>6</sub> ] |
|---------------------------------------------|----------------------------------------------------------------------------------|
| Empirical formula                           | C <sub>38</sub> H <sub>36</sub> BF <sub>4</sub> IrN <sub>6</sub>                 |
| Formula weight                              | 855.74                                                                           |
| Temperature/K                               | 150                                                                              |
| Crystal system                              | triclinic                                                                        |
| Space group                                 | P-1                                                                              |
| a/Å                                         | 8.6524(4)                                                                        |
| b/Å                                         | 12.6306(8)                                                                       |
| c/Å                                         | 16.5547(10)                                                                      |
| α/°                                         | 77.983(6)                                                                        |
| β/°                                         | 78.821(5)                                                                        |
| γ/°                                         | 85.964(5)                                                                        |
| Volume/Å <sup>3</sup>                       | 1735.11(18)                                                                      |
| Z                                           | 2                                                                                |
| ρ <sub>calc</sub> /cm <sup>3</sup>          | 1.638                                                                            |
| μ/mm <sup>-1</sup>                          | 7.943                                                                            |
| F(000)                                      | 848.0                                                                            |
| Crystal size/mm <sup>3</sup>                | 0.08 × 0.02 × 0.01                                                               |
| Radiation                                   | Cu Kα (λ = 1.54178)                                                              |
| 2θ range for data collection/°              | 5.552 to 140.11                                                                  |
| Index ranges                                | -10 ≤ h ≤ 8, -15 ≤ k ≤ 15, -20 ≤ l ≤ 20                                          |
| Reflections collected                       | 27371                                                                            |
| Independent reflections                     | 6455 [R <sub>int</sub> = 0.1101, R <sub>sigma</sub> = 0.0902]                    |
| Data/restraints/parameters                  | 6455/0/460                                                                       |
| Goodness-of-fit on F <sup>2</sup>           | 1.071                                                                            |
| Final R indexes [I >= 2σ (I)]               | R <sub>1</sub> = 0.0750, wR <sub>2</sub> = 0.1838                                |
| Final R indexes [all data]                  | R <sub>1</sub> = 0.1124, wR <sub>2</sub> = 0.2050                                |
| Largest diff. peak/hole / e Å <sup>-3</sup> | 2.08/-3.47                                                                       |



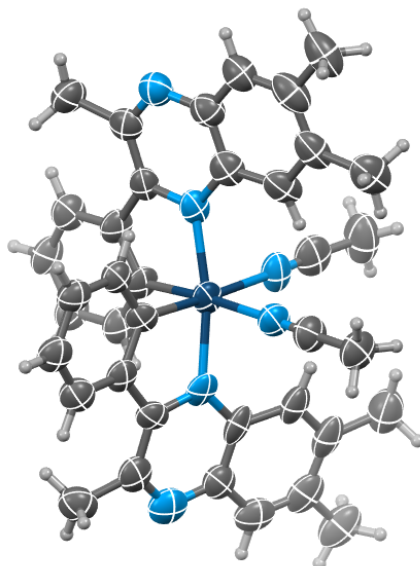

**Figure S28.** Single crystal X-ray structure of  $[\text{Ir}(\text{Me}_3\text{quinox})_2(\text{MeCN})_2][\text{BF}_4]$  (ellipsoids plotted at the 50% probability level; H-atoms and counter anions omitted for clarity)

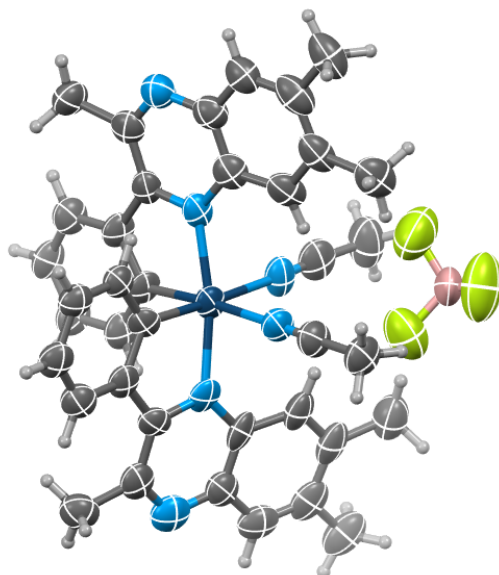

**Figure S29.** Single crystal X-ray structure of  $[\text{Ir}(\text{Me}_3\text{quinox})_2(\text{MeCN})_2][\text{BF}_4]$  (ellipsoids plotted at the 50% probability level; counter anions omitted for clarity)

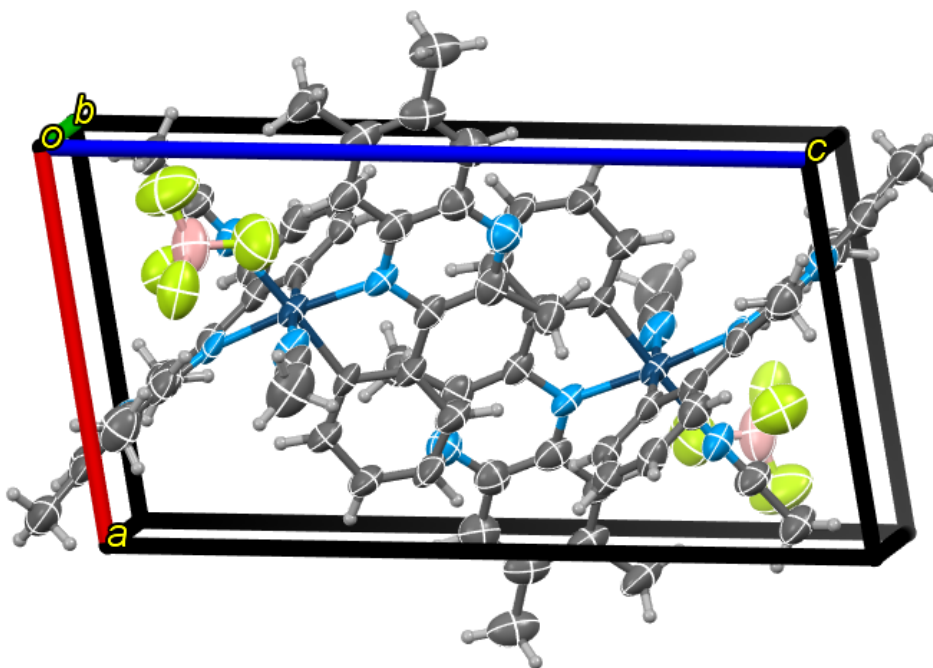

**Figure S30.** Unit cell packing of  $[\text{Ir}(\text{Me}_3\text{quinox})_2(\text{MeCN})_2][\text{BF}_4]$  (ellipsoids plotted at the 50% probability level)

## S2.2 Structure of $[\text{Ir}(\text{Me}_3\text{quinox})_2(\text{bipy-lm2})][\text{PF}_6]_3$

**Table S2.** Crystals data and structure refinement for  $[\text{Ir}(\text{Me}_3\text{quinox})_2(\text{bipy-lm2})][\text{PF}_6]_3$

| Identification code                            | $[\text{Ir}(\text{Me}_3\text{quinox})_2(\text{bipy-lm2})][\text{PF}_6]_3$ |
|------------------------------------------------|---------------------------------------------------------------------------|
| Empirical formula                              | $\text{C}_{54}\text{H}_{52}\text{F}_{18}\text{IrN}_{10}\text{P}_3$        |
| Formula weight                                 | 1468.16                                                                   |
| Temperature/K                                  | 100.15                                                                    |
| Crystal system                                 | triclinic                                                                 |
| Space group                                    | P-1                                                                       |
| a/Å                                            | 16.5187(2)                                                                |
| b/Å                                            | 18.7439(3)                                                                |
| c/Å                                            | 22.3271(3)                                                                |
| $\alpha/^\circ$                                | 105.1570(10)                                                              |
| $\beta/^\circ$                                 | 108.1430(10)                                                              |
| $\gamma/^\circ$                                | 94.9750(10)                                                               |
| Volume/Å <sup>3</sup>                          | 6233.35(16)                                                               |
| Z                                              | 4                                                                         |
| $\rho_{\text{calc}}/\text{cm}^3$               | 1.564                                                                     |
| $\mu/\text{mm}^{-1}$                           | 2.317                                                                     |
| F(000)                                         | 2920.0                                                                    |
| Crystal size/mm <sup>3</sup>                   | 0.12 × 0.1 × 0.025                                                        |
| Radiation                                      | Mo K $\alpha$ ( $\lambda = 0.71073$ )                                     |
| 2 $\theta$ range for data collection/ $^\circ$ | 4.406 to 57.398                                                           |
| Index ranges                                   | $-22 \leq h \leq 22, -25 \leq k \leq 25, -30 \leq l \leq 30$              |
| Reflections collected                          | 170000                                                                    |
| Independent reflections                        | 32116 [ $R_{\text{int}} = 0.0806, R_{\text{sigma}} = 0.0667$ ]            |
| Data/restraints/parameters                     | 32116/264/1628                                                            |
| Goodness-of-fit on $F^2$                       | 1.032                                                                     |
| Final R indexes [ $I \geq 2\sigma(I)$ ]        | $R_1 = 0.0525, wR_2 = 0.1192$                                             |
| Final R indexes [all data]                     | $R_1 = 0.0848, wR_2 = 0.1312$                                             |
| Largest diff. peak/hole / e Å <sup>-3</sup>    | 3.72/-1.20                                                                |

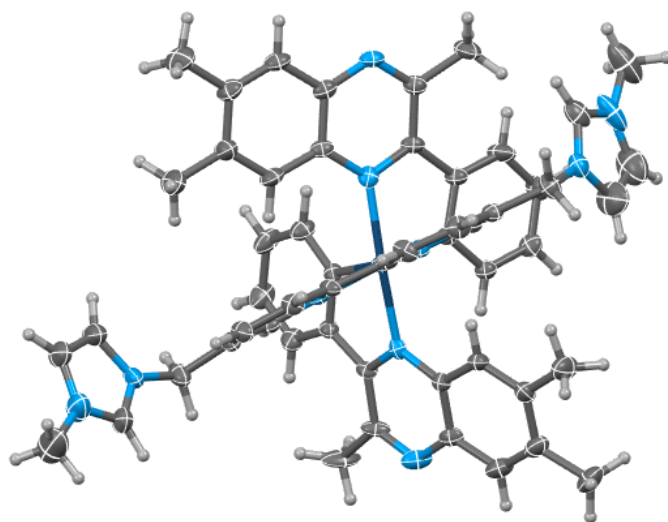

**Figure S32.** Single crystal X-ray structure of [Ir(Me<sub>3</sub>quinox)<sub>2</sub>(bipy-Im<sub>2</sub>)]<sup>+</sup>[PF<sub>6</sub>]<sub>3</sub><sup>-</sup> (ellipsoids plotted at the 50% probability level; counter anions omitted for clarity)

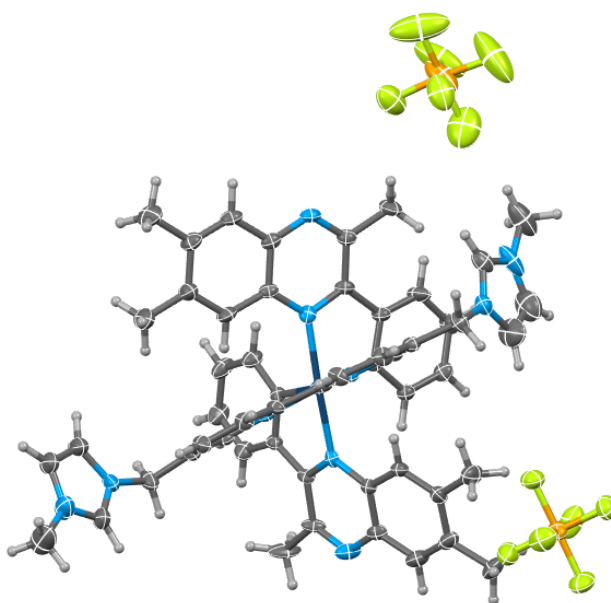

**Figure S33.** Single crystal X-ray structure of [Ir(Me<sub>3</sub>quinox)<sub>2</sub>(bipy-Im<sub>2</sub>)]<sup>+</sup>[PF<sub>6</sub>]<sub>3</sub><sup>-</sup> (ellipsoids plotted at the 50% probability level)

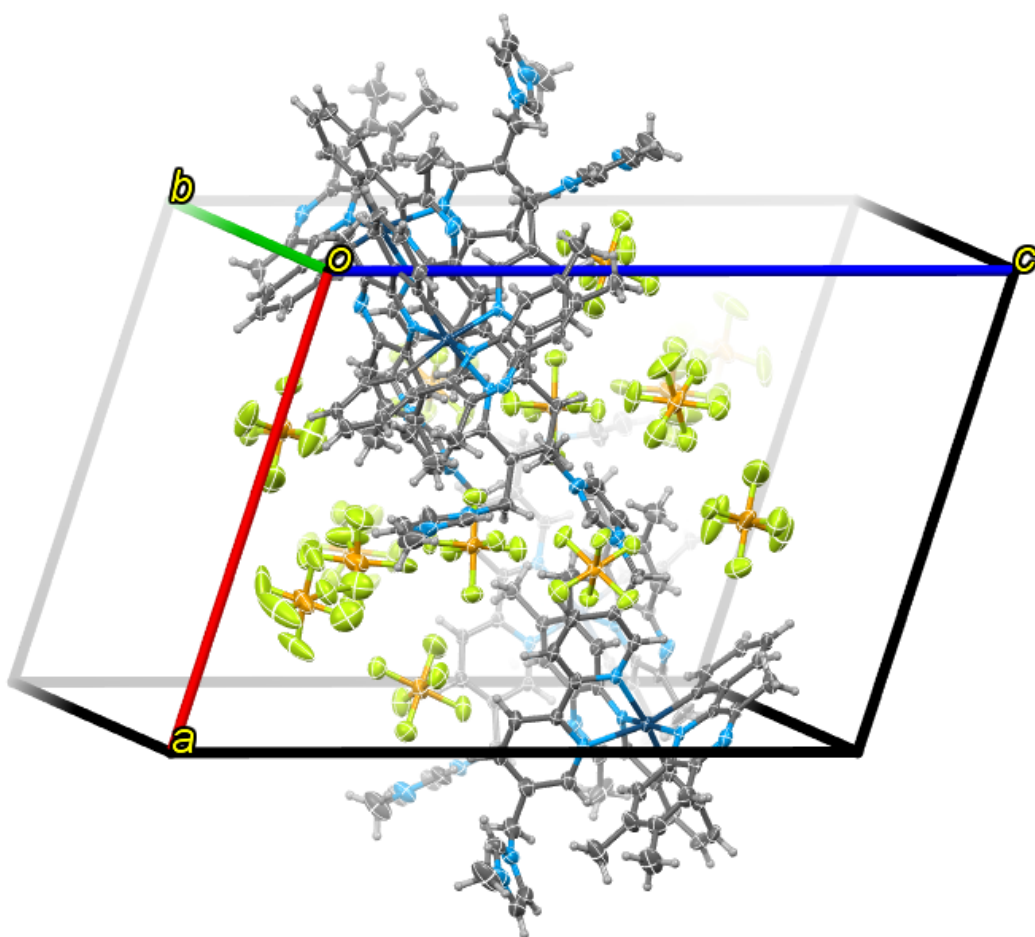

**Figure S34.** Unit cell packing of [Ir(Me<sub>3</sub>quinox)<sub>2</sub>(bipy-Im<sub>2</sub>)]<sup>+</sup>[PF<sub>6</sub>]<sub>3</sub><sup>-</sup> (ellipsoids plotted at the 50% probability level)

### S2.3 Structure of [Ru-Au][PF<sub>6</sub>]<sub>3</sub>

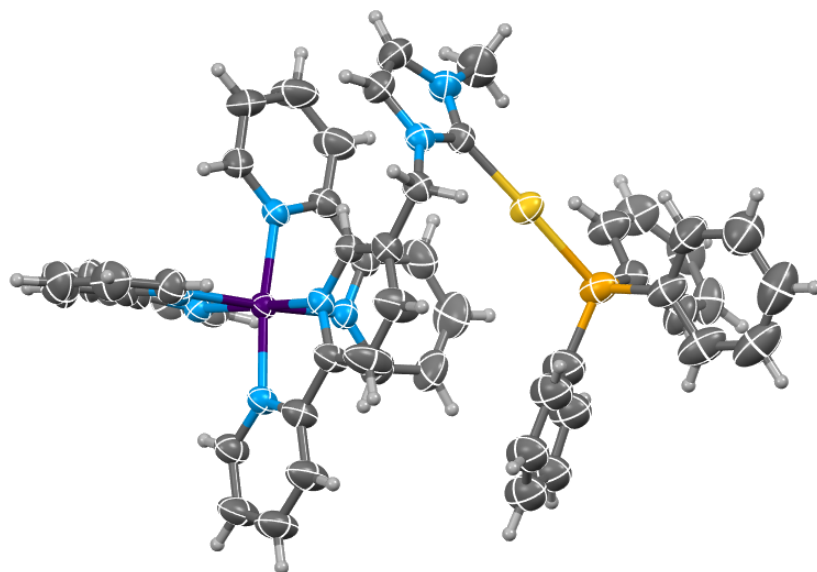

**Figure S35.** Single crystal X-ray structure of [Ru-Au][PF<sub>6</sub>]<sub>3</sub> (ellipsoids plotted at the 50% probability level; counter anions and disorder omitted for clarity)

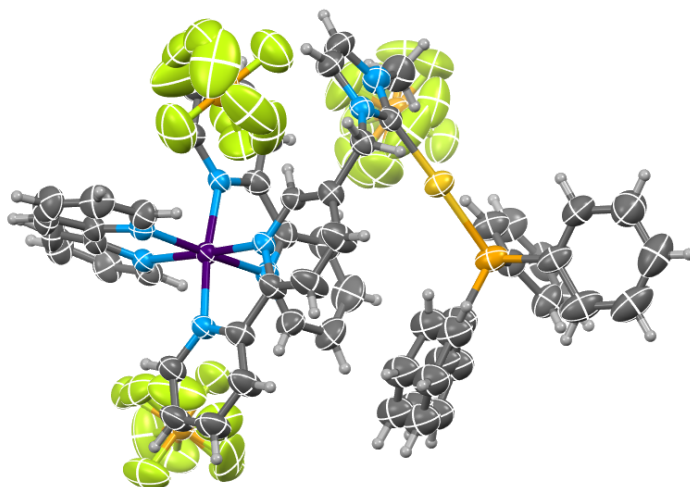

**Figure S36.** Single crystal X-ray structure of [Ru-Au][PF<sub>6</sub>]<sub>3</sub> (ellipsoids plotted at the 50% probability level)

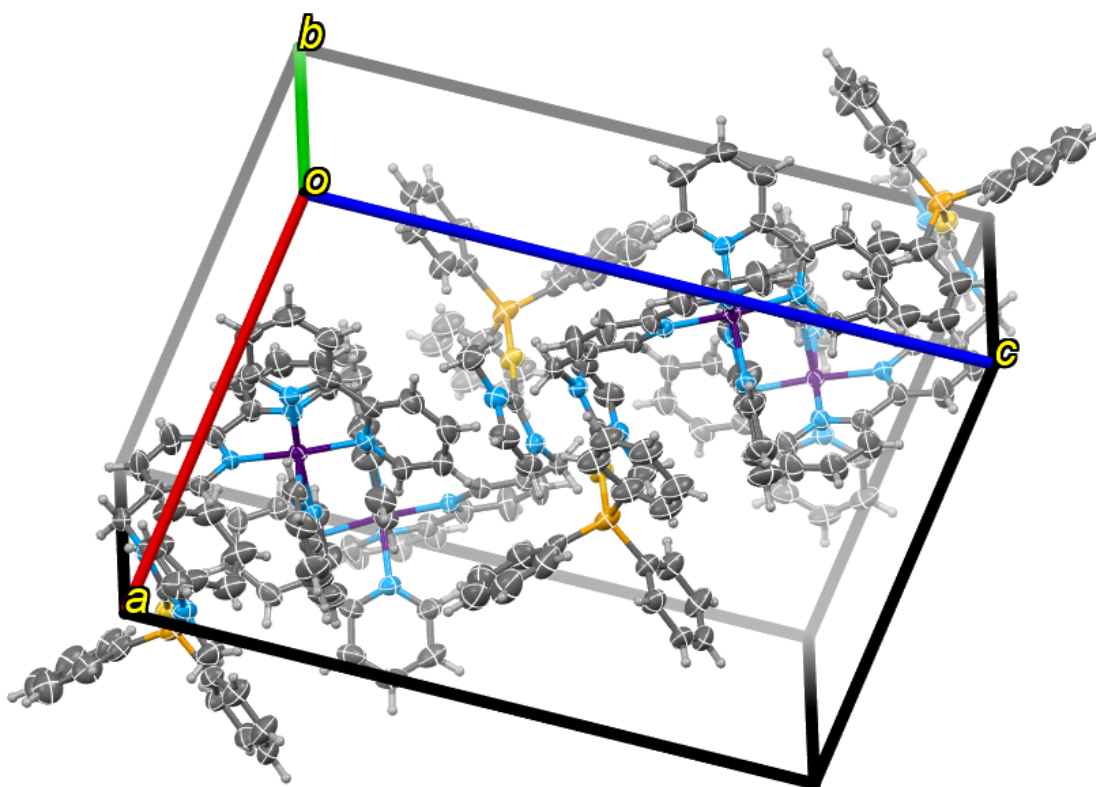

**Figure S37.** Unit cell packing of  $[\text{Ru-Au}][\text{PF}_6]_3$  (ellipsoids plotted at the 50% probability level)

**Table S3.** Crystals data and structure refinement for  $[\text{Ru-Au}][\text{PF}_6]_3$

| Identification code                           | $[\text{Ru-Au}][\text{PF}_6]_3$                                          |
|-----------------------------------------------|--------------------------------------------------------------------------|
| Empirical formula                             | $\text{C}_{53}\text{H}_{45}\text{AuF}_{18}\text{N}_8\text{P}_4\text{Ru}$ |
| Formula weight                                | 1557.88                                                                  |
| Temperature/K                                 | 293(2)                                                                   |
| Crystal system                                | monoclinic                                                               |
| Space group                                   | $P1\ 2_1/n1$                                                             |
| $a/\text{\AA}$                                | 13.5010(3)                                                               |
| $b/\text{\AA}$                                | 21.5970(4)                                                               |
| $c/\text{\AA}$                                | 20.6880(5)                                                               |
| $\alpha/^\circ$                               | 90                                                                       |
| $\beta/^\circ$                                | 98.515(2)                                                                |
| $\gamma/^\circ$                               | 90                                                                       |
| Volume/ $\text{\AA}^3$                        | 5965.70 (2)                                                              |
| Z                                             | 4                                                                        |
| $\rho_{\text{calc}}/\text{g/cm}^3$            | 1.735                                                                    |
| $\mu/\text{mm}^{-1}$                          | 2.917                                                                    |
| F(000)                                        | 2920.0                                                                   |
| Crystal size/ $\text{mm}^3$                   | $0.46 \times 0.21 \times 0.07$                                           |
| Radiation                                     | Mo $K\alpha$ ( $\lambda = 0.71073$ )                                     |
| $2\theta$ range for data collection/ $^\circ$ | 6.864 to 59.83                                                           |
| Index ranges                                  | $-18 \leq h \leq 18, -29 \leq k \leq 29, -28 \leq l \leq 28$             |
| Reflections collected                         | 62240                                                                    |
| Independent reflections                       | 32116 [ $R_{\text{int}} = 0.0806, R_{\text{sigma}} = 0.0667$ ]           |
| Data/restraints/parameters                    | 15106/180/867                                                            |
| Goodness-of-fit on $F^2$                      | 1.041                                                                    |

|                                                |                                  |
|------------------------------------------------|----------------------------------|
| Final R indexes [ $I \geq 2\sigma(I)$ ]        | $R_1 = 0.0373$ , $wR_2 = 0.0735$ |
| Final R indexes [all data]                     | $R_1 = 0.0738$ , $wR_2 = 0.0874$ |
| Largest diff. peak/hole / $e \text{ \AA}^{-3}$ | 0.828/-0.820                     |

**Table S4.** Bond metrics for  $[\text{Ir}(\text{Me}_3\text{quinox})_2(\text{bipy-Im2})][\text{PF}_6]_3$  and  $[\text{Ir}(\text{Me}_3\text{quinox})_2(\text{bipy})][\text{PF}_6]$

| Atom numbers                                   | $[\text{Ir}(\text{Me}_3\text{quinox})_2(\text{bipy-Im2})][\text{PF}_6]_3$ | $[\text{Ir}(\text{Me}_3\text{quinox})_2(\text{bipy})][\text{PF}_6]^4$ |
|------------------------------------------------|---------------------------------------------------------------------------|-----------------------------------------------------------------------|
| Bond lengths (Å) / Bond angles (°)             |                                                                           |                                                                       |
| Ir1-N <sub>bipy1</sub>                         | 2.207                                                                     | 2.176                                                                 |
| Ir1-N <sub>bipy2</sub>                         | 2.166                                                                     | 2.168                                                                 |
| Ir1-N <sub>quinox1</sub>                       | 2.064                                                                     | 2.090                                                                 |
| Ir1-N <sub>quinox2</sub>                       | 2.077                                                                     | 2.067                                                                 |
| Ir1-C <sub>quinox1</sub>                       | 1.982                                                                     | 1.991                                                                 |
| Ir1-C <sub>quinox2</sub>                       | 2.006                                                                     | 2.014                                                                 |
| N <sub>bipy1</sub> -Ir1-C <sub>quinox1</sub>   | 172.53                                                                    | 170.08                                                                |
| N <sub>bipy2</sub> -Ir1-C <sub>quinox2</sub>   | 167.16                                                                    | 170.96                                                                |
| N <sub>quinox1</sub> -Ir1-N <sub>quinox2</sub> | 172.53                                                                    | 175.08                                                                |

**Table S5.** Bond metrics for  $[\text{Ru-Au}]\text{-PF}_6]_3$

| Atom numbers                       | $[\text{Ru-Au}][\text{PF}_6]_3$ | $[\text{Ru}(\text{bipy})_2(\text{bipy-Im2})][\text{PF}_6]_4^5$ |
|------------------------------------|---------------------------------|----------------------------------------------------------------|
| Bond lengths (Å) / Bond angles (°) |                                 |                                                                |
| Ru1-N2                             | 2.071(3)                        | 2.071                                                          |
| Ru1-N13                            | 2.065(3)                        | 2.086                                                          |
| Ru1-N14                            | 2.057(3)                        | 2.071                                                          |
| Ru1N25                             | 2.051(3)                        | 2.054                                                          |
| Ru1-N26                            | 2.064(3)                        | 2.060                                                          |
| Ru1-N37                            | 2.039(3)                        | 2.065                                                          |
| Au45-P46                           | 2.2884(9)                       |                                                                |
| Au45-C43                           | 2.034(3)                        |                                                                |
| N2-Ru1-N37                         | 174.88(10)                      | 175.66                                                         |
| N13-Ru1-N-14                       | 173.68(11)                      | 176.72                                                         |
| N25-Ru1-N26                        | 173.17(11)                      | 170.30                                                         |
| C43-Au-45-P-46                     | 177.94(12)                      |                                                                |

### S3. Spectroscopy

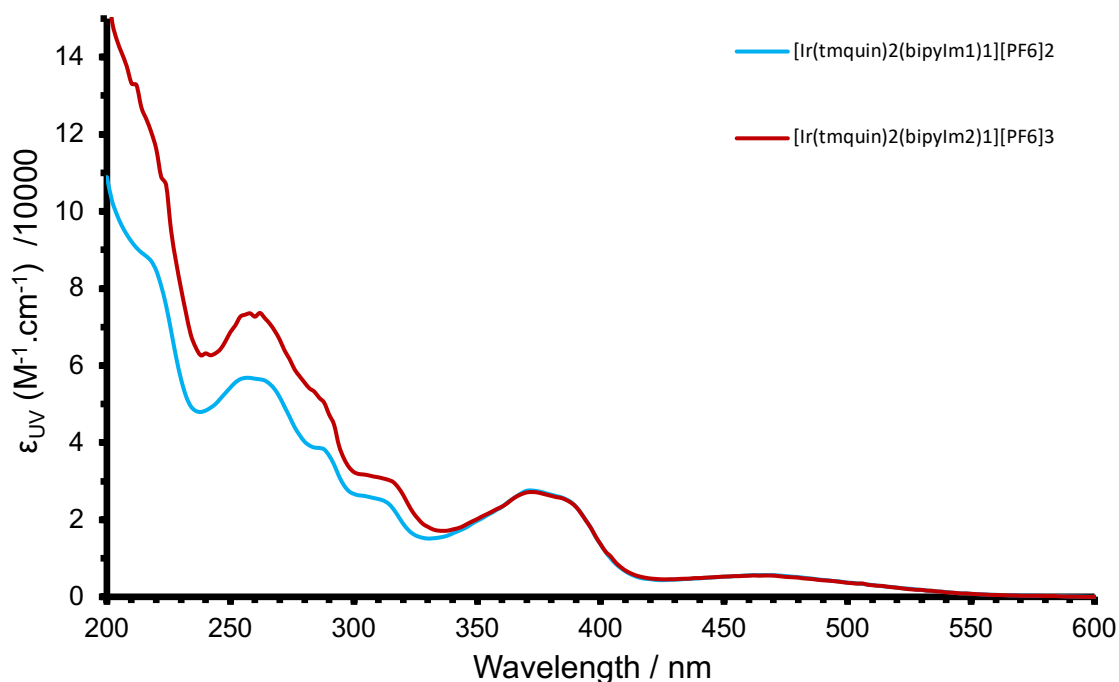

**Figure S38.** Absorption spectra for the polycationic iridium complexes (293 K, aerated MeCN,  $10^{-5}$  M).

### S4. Cyclic Voltammetry

Cyclic voltammetry was performed using a PalmSens4 potentiostat. Experiments were performed using HPLC grade MeCN with an analyte concentration of 1 mM at 293 K, using triply recrystallised  $[\text{tBu}_4\text{N}][\text{PF}_6]$  as the supporting electrolyte at 0.25 M concentration. A three-electrode setup was used, consisting of a platinum disc working electrode, a platinum wire counter-electrode and a silver wire pseudo-reference. Solutions were sparged for 10 minutes with MeCN saturated stream of nitrogen gas. Voltammograms were referenced to the ferrocene/ferrocenium redox couple measured using the same conditions.

**Table S6.** Electrode oxidation potentials of the family of homo- and heterometallic complexes (mV shifts presented in parentheses)

| Complex                                                                   | Ox         |
|---------------------------------------------------------------------------|------------|
| $[\text{Ir}(\text{Me}_3\text{quinox})_2(\text{bipy-Im1})][\text{PF}_6]_2$ | 0.98 (100) |
| $[\text{Ir}(\text{Me}_3\text{quinox})_2(\text{bipy-Im2})][\text{PF}_6]_3$ | 0.99 (110) |
| $[\text{Ir-Au}][\text{PF}_6]_2$                                           | 1.01 (110) |
| $[\text{Ir-Au}_2][\text{PF}_6]_3$                                         | 1.04 (140) |
| $[\text{Ru-Au}][\text{PF}_6]_3$                                           | 0.93 (110) |
| $[\text{Ru-Au}_2][\text{PF}_6]_4$                                         | 0.94 (110) |



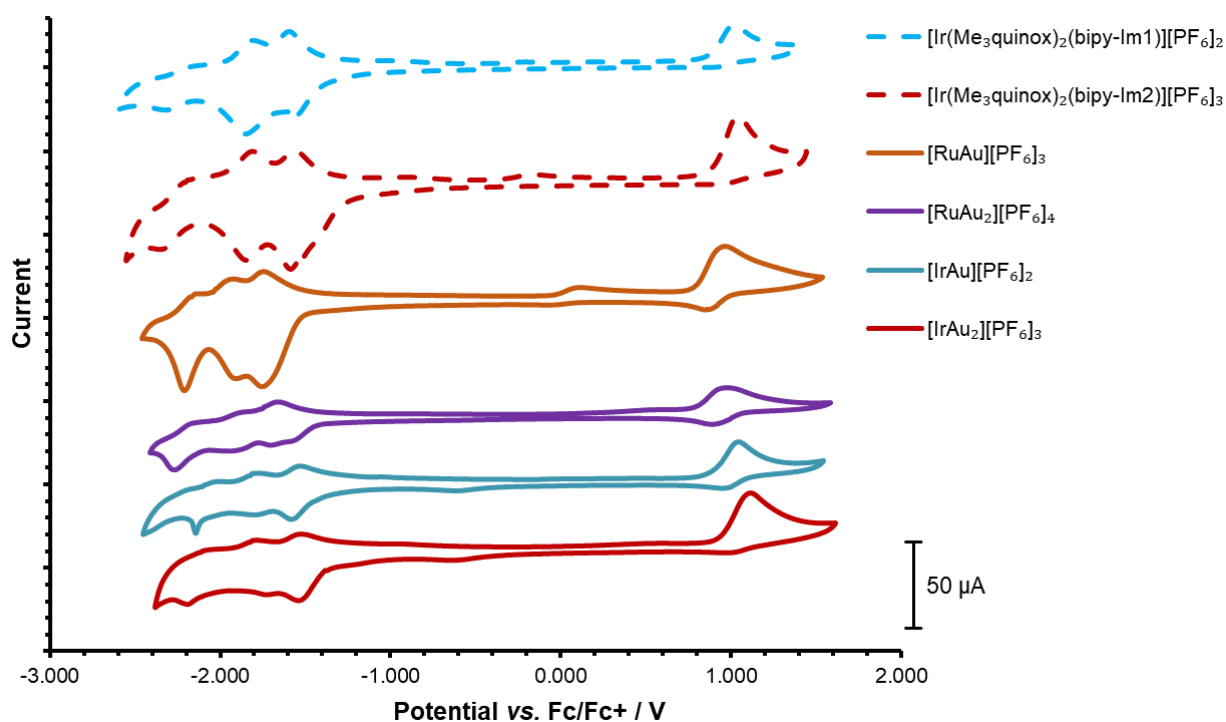

**Figure S39.** Cyclic voltammograms for the family of monometallic Ir/Ru heteropolymetallic Ir/Ru-Au complexes

## S5. References

- <sup>1</sup> O.V. Dolomanov, L.J. Bourhis, R.J. Gildea, J.A.K. Howard, H. Puschmann, *J. Appl. Cryst.*, 2009, **42**, 339-341.
- <sup>2</sup> G.M. Sheldrick, *Acta Cryst.*, 2015, **A71**, 3-8.
- <sup>3</sup> G.M. Sheldrick, *Acta Cryst.*, 2015, **C71**, 3-8
- <sup>4</sup> K.A. Phillips, T.M. Stonelake, K. Chen, Y. Hou, J. Zhao, S.J. Coles, P.N. Horton, S.J. Keane, E.C. Stokes, I.A. Fallis, A.J. Hallett, S.P. O'Kell, J.B. Beames, S.J.A. Pope, *Chem. Eur. J.*, 2018, **24**, 8577
- <sup>5</sup> R.C. Knighton, J.M. Beames, S. J. A. Pope, *Inorg. Chem.* 2023, **62**, 48, 19446–19456.
